# Modeling the efficacy of CRISPR gene drive for schistosomiasis control

Richard E. Grewelle<sup>1,2\*</sup>, Javier Perez-Saez<sup>3</sup>, Josh Tycko<sup>4</sup>,  
Erica K.O. Namigai<sup>5</sup>, Chloe G. Rickards<sup>6</sup>, Giulio A. De Leo<sup>1,2,7\*</sup>

<sup>1</sup>Department of Biology, Stanford University, Stanford, CA, USA

<sup>2</sup>Hopkins Marine Station, Pacific Grove, CA 93950, USA

<sup>3</sup>Department of Epidemiology, Johns Hopkins Bloomberg School of Public Health, MD, USA

<sup>4</sup>Department of Genetics, Stanford University, Stanford, CA, USA

<sup>5</sup>Department of Zoology, University of Oxford, Oxford, UK

<sup>6</sup>Department of Biology, University of California Santa Cruz, Santa Cruz, CA, USA

<sup>7</sup>Woods Institute for the Environment, Stanford University, Stanford, CA, USA

\*To whom correspondence should be addressed;

E-mail: [regrew@stanford.edu](mailto:regrew@stanford.edu), [deleo@stanford.edu](mailto:deleo@stanford.edu)

## Abstract

**CRISPR gene drives could revolutionize the control of infectious diseases by accelerating the spread of engineered traits that limit parasite transmission in wild populations. While much effort has been spent developing gene drives in mosquitoes, gene drive technology in molluscs has received little attention despite the role of freshwater snails as obligate, intermediate hosts of parasitic flukes causing schistosomiasis – a disease of poverty affecting more than 200 million people worldwide. A successful drive in snails must overcome self-fertilization, which prevents a drive’s spread. Simultaneous hermaphroditism is a feature of snails – distinct from gene drive model organisms – and is not**

**yet incorporated in gene drive models of disease control. Here we developed a novel population genetic model accounting for snails' sexual and asexual reproduction, susceptibility to parasite infection regulated by multiple alleles, fitness differences between genotypes, and a range of drive characteristics. We then integrated this model with an epidemiological model of schistosomiasis transmission and snail population dynamics. Simulations showed that gene drive establishment can be hindered by a variety of biological and ecological factors, including selfing. However, our model suggests that, under a range of conditions, gene drive mediated immunity in snails could maintain rapid disease reduction achieved by annual chemotherapy treatment of the human population, leading to long-term elimination. These results indicate that gene drives, in coordination with existing public health measures, may become a useful tool to reduce schistosomiasis burden in selected transmission settings with effective CRISPR construct design and close evaluation of the genetic and ecological landscape.**

Keywords: *CRISPR-Cas9* | *epidemiology* | *population genetics* | *immunity* | *self-fertilization*

## 1 **Introduction**

2 Gene drive technology is rapidly expanding since the discovery of CRISPR-Cas9 [1–3]. Its  
3 potential uses include controlling diseases, invasive species, and pests by spreading targeted  
4 genes through a population faster than traditional Mendelian inheritance allows [4]. For exam-  
5 ple, there are currently large efforts to harness genetic technology targeting mosquito species  
6 that are vectors of malaria and other vector-borne diseases [5–9]. Similar efforts could be on  
7 the horizon for schistosomiasis, a debilitating disease of poverty caused by blood flukes of the  
8 genus *Schistosoma* [10].

9 The battle to eliminate schistosomiasis has been waged for more than a century, and despite  
10 local successes, the disease remains widespread [11]. Globally over 200 million individuals are  
11 actively infected. With 800 million people at risk of infection, schistosomiasis is second only  
12 to malaria in the breadth of its health and economic impact as an infectious tropical disease  
13 [12, 13]. The disease manifests as a complex suite of symptoms stemming primarily from the  
14 inflammatory processes the body mounts in response to the schistosome eggs that embed in  
15 tissue [14]. Abdominal pain, release of blood in urine or stool, fever, enlargement of liver or  
16 spleen, and accumulation of fluid in the peritoneal cavity are acute symptoms, while fibrosis  
17 and lesions of vital organs, infertility, and several forms of cancer are lasting consequences of  
18 infection [15, 16].

19 Transmission of schistosomes to intermediate, obligate snail hosts occurs when eggs shed in  
20 urine or feces from infected people contact freshwater and emerge as free-swimming miracidia.  
21 Once established within the snail, the parasite reproduces asexually and cercariae are released  
22 3-5 weeks after the onset of infection. In this stage, the parasites castrate the freshwater snails,  
23 severely reducing reproduction [17]. Released cercariae can penetrate the skin of humans in  
24 contact with infested water bodies and cause infection (Fig 1) [18].

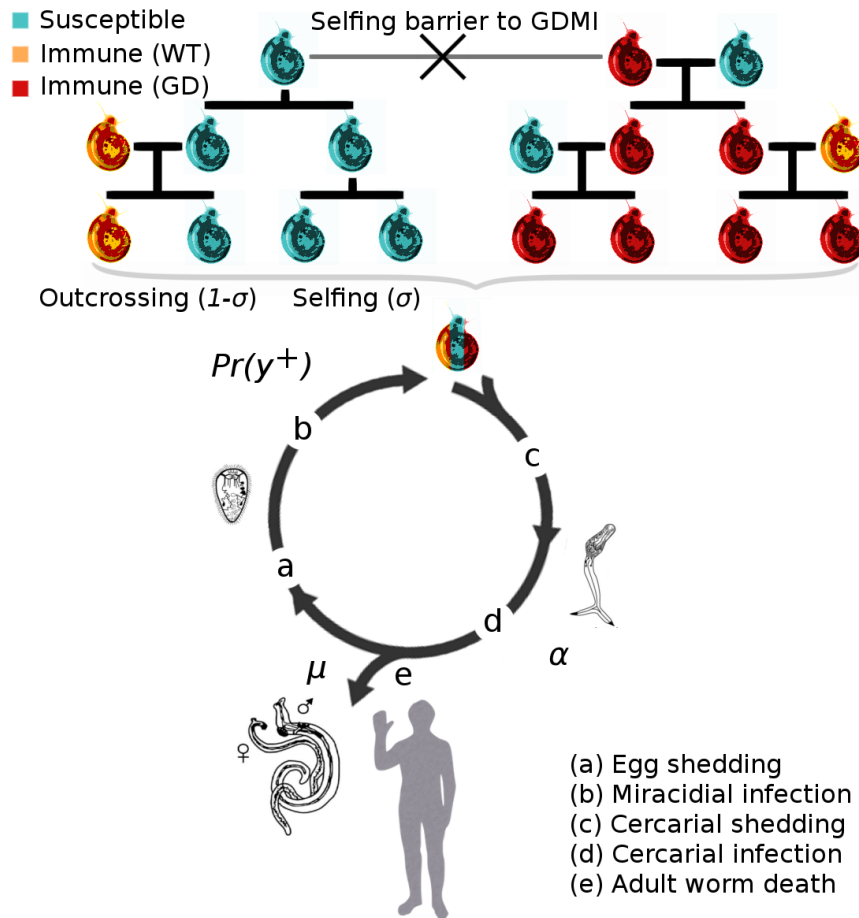

Figure 1: Conceptual diagram of the integrated epidemiological and population genetic model describing the evolution of immunity to schistosome infection in the snail population. (a) High worm burden in the human population increases the force of infection on the snail population, which positively selects for immune snail genotypes. (b) Miracidial infection of susceptible snails is density-dependent. (c) Evolution of immunity in the snail population reduces cercarial transmission to humans, thereby regulating parasite densities at an endemic equilibrium. GDMI is inherited more rapidly than natural immunity only when outcrossing occurs. (d) Infection of humans is proportional to cercarial output, and a negative binomial distribution of adult worms in the human population influences mating success and egg production. Immunity in the human population is assumed constant due to accumulated evidence that immunity acquisition occurs over decades and likely varies little relative to immunity in the snail population in a 10 year window in endemic conditions. (e) Mortality of adult worms occurs via constant natural mortality and MDA treatment. Three snail genotypes are modeled: susceptible to infection, innately immune (wild type), and gene drive mediated immune. Iteroparitive reproduction and mortality of these genotypes is modeled with explicit fecundity and viability components of fitness (see SI).

25 Rapid advancements in genomics for the intermediate snail host species provides a mecha-  
26 nistic understanding of innate, genetically-based snail immunity to schistosome infection [19].  
27 Genes responsible for immunity could be candidates for gene drive mediated spread through  
28 snail host populations. Promisingly, selection experiments reveal rapid evolution of immune  
29 phenotypes, demonstrating high immunity can be achieved under laboratory conditions within  
30 a few snail generations [20, 21] (SI Fig. S3). Overall, there is good reason to expect that a  
31 CRISPR gene drive designed to provide greater immunity in the snail population could soon  
32 be developed. However, whether such a gene drive could provide the sustained reduction in  
33 transmission necessary to eliminate schistosomiasis in realistic settings laden with barriers to  
34 the spread of a drive remains unknown.

35 Previous theoretical work using classical population genetic models has explored how fit-  
36 ness, homing efficiency, selfing, resistance allele formation, gene flow, and other forms of pop-  
37 ulation structure influence invasion success and peak frequency of a drive in general contexts  
38 [22–24]. Stochastic Moran models or discrete deterministic models with non-overlapping gen-  
39 erations do not incorporate population dynamics on which the tempo of evolution is highly  
40 dependent. Snail populations are iteroparous, reproducing several times within a lifetime, and  
41 exhibit density dependent recruitment. This form of reproduction is not modeled in the sim-  
42 plified evolutionary models developed for gene drives to date. Accuracy of gene drive models  
43 hinges on realistic assumptions of the target population.

44 The success of gene drive mediated immunity (GDMI) in natural snail populations is de-  
45 termined by features intrinsic to the design of the drive construct and its deployment – homing  
46 efficiency, fitness cost of the payload, evolution of resistance to the drive, and number of re-  
47 leases – and by extrinsic properties of the environment in which GDMI is deployed, such as the  
48 size of the focal snail population, transmission rates, and gene flow and standing genetic varia-  
49 tion for immunity in snail populations. Importantly, all snail species that serve as intermediate

50 hosts to schistosomes, except for *Oncomelania spp.*, are simultaneous hermaphrodites capable  
51 of self-fertilization (selfing). In contrast to mosquito and fruit fly models for which gene drives  
52 have been designed, selfing snail species may be incapable of propagating a drive construct.  
53 Gene drive relies on an encoded endonuclease, such as Cas9, which introduces a double strand  
54 break in the homologous chromosome that is repaired using the gene drive allele as a template,  
55 thereby copying the gene drive allele to the homologous chromosome [4, 5]. Sexual reproduc-  
56 tion (outcrossing) is necessary for gene drive to spread a target allele in a population through  
57 pairing and reassortment of gene drive and wild type alleles, facilitating gene conversion. Be-  
58 cause the propensity to self-fertilize varies by species and environmental conditions [25], it is  
59 imperative to understand how selfing interacts with the variety of intrinsic and extrinsic factors  
60 that may influence the establishment of GDMI in natural snail populations.

61 The impact of GDMI is determined by public health outcomes and not by establishment  
62 alone. Local success in schistosomiasis reduction can be achieved through sustained non-  
63 pharmaceutical intervention, but such approaches are often resource intensive (e.g. sanitation)  
64 or cause collateral damage to the environment (e.g. molluscicides) [26, 27]. Praziquantel (PZQ)  
65 emerged in the 1980s as the drug of choice for mass drug administration (MDA) [28, 29], and  
66 while cheap and effective in removing mature parasites from infected people and temporarily re-  
67 ducing morbidity, PZQ does not prevent reinfection, and extensive MDA campaigns have been  
68 unable to locally eliminate the disease in high transmission regions [30, 31]. For this reason,  
69 in recent years there has been a renewed interest in complementing MDA with environmental  
70 interventions aimed at targeting the environmental reservoirs of the disease [32–35]. GDMI  
71 has the potential to augment environmental interventions as a means toward cost-effective and  
72 sustainable schistosomiasis elimination, especially when paired with existing anthelmintic treat-  
73 ment of humans.

74 We investigate the role of selfing and its interaction with other factors influencing GDMI

75 establishment to infer the challenges and opportunities for GDMI in a natural context. We  
76 hypothesized that a high selfing rate would incapacitate a gene drive, but a lower selfing rate  
77 could be compatible with a drive in certain conditions. To test these ideas we developed a  
78 biologically realistic mathematical model incorporating both genetic and environmental factors.  
79 This model is integrated in an epidemiological framework to evaluate the reduction of disease  
80 burden in humans with and without coincident MDA treatment. This study can be used as an  
81 informative first step for scientists, stakeholders, and policy makers looking to address the large  
82 human health crisis of schistosomiasis in conjunction with the principles for responsible use  
83 of gene drives proposed by the National Academies of Science, Engineering, and Medicine  
84 (NASEM) [36].

## 85 **Results**

86 We developed a population genetic model that accounts separately for fecundity and viability  
87 components of fitness as well as for density dependent dynamics of the snail host population.  
88 We expand the wild type - gene drive, 2 allele model to separate the naturally occurring al-  
89 leles into immune and susceptible types. The resulting six genotypes are formed from three  
90 alleles (susceptible, innately immune, gene drive mediated immune) and incorporated into a  
91 Markov model modified to include overlapping generations and population dynamics of sus-  
92 ceptible and infected snails. Finally, we integrated the population genetic and ecological model  
93 with an epidemiological model to describe the dynamics of infection in the human population.  
94 Parameter values for the genetic model are derived from literature (SI Table S1) or otherwise  
95 explored in sensitivity analyses in the resulting figures, and under default conditions, simulated  
96 evolution recapitulates challenge experiments (SI Fig. S3). We examine the impact that the  
97 self-fertilization (selfing) rate of a focus population has on the establishment of gene drive in 10  
98 years.

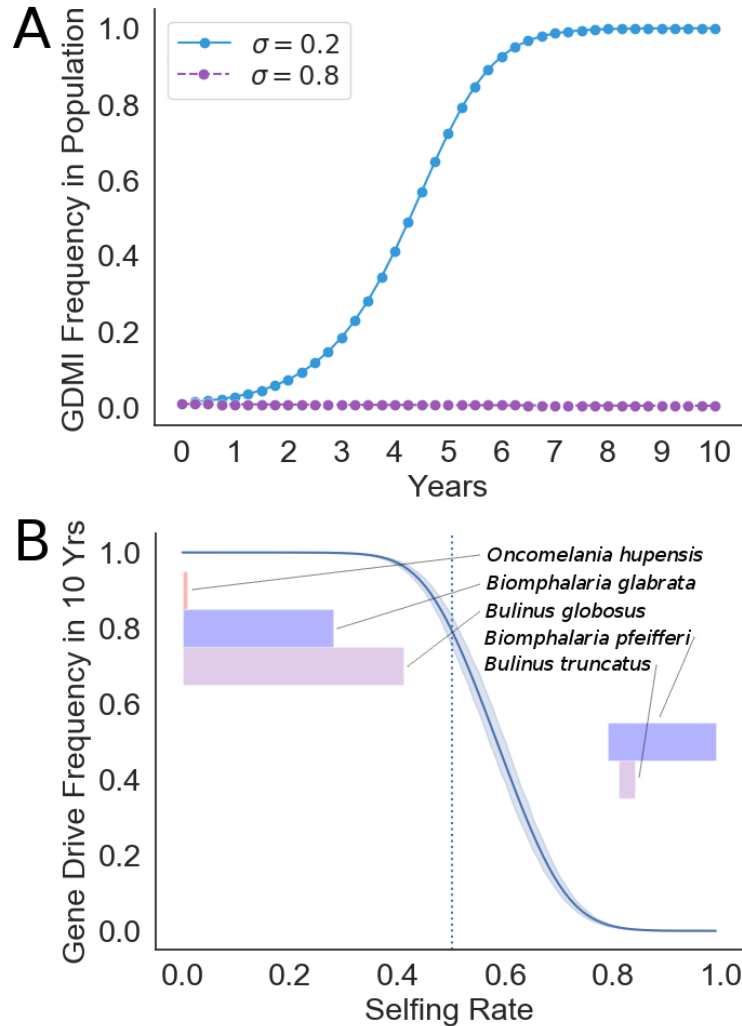

Figure 2: Self-fertilization rate strongly affects establishment of gene drive in a 10 year window. (A) Simulation of gene drive invasion under default conditions when self-fertilization rate is low at 0.2 and high at 0.8. (B) Endpoint sensitivity analysis depicting the gene drive frequency in the population after 10 years under variable self-fertilization rates ( $\sigma$ ) from 0 to 1. 95% confidence intervals are reported on the range of results when the fecundity cost of inbreeding varies on the uniform distribution [0,0.6]. The vertical dotted line designates  $\sigma = 0.5$ , which is the value used in future simulations to represent an intermediate selfing rate from those observed. Shaded bars colored by genus display ranges (mean  $\pm$  1 s.d.) of observed selfing rates for each host snail species for which empirical measures exist [37]. Vertical positioning of the bars is ordered by minimum selfing rate according to the displayed ranges.



99 To represent the two species clusters, we depict results from both ends of the range of ob-  
100 served selfing rates among snail hosts. At high rates ( $\sigma = 0.8$ ), self-fertilization undermines the  
101 gene drive and prevents establishment. However, GDMI is able to overcome low rates of self-  
102 fertilization ( $\sigma = 0.2$ ) and establish at high frequencies (Fig. 2A). Self-fertilization is largely  
103 species dependent and may vary with local conditions with higher propensities to self-fertilize  
104 observed at low population densities [37]. To simulate this range of conditions, we perform a  
105 sensitivity analysis at the 10 year endpoint, so chosen as the likely window in which the effi-  
106 cacy of targeted treatments are evaluated in human populations. Especially for predominantly  
107 outcrossing species, reduced offspring viability is associated with self-fertilization [37]. We  
108 provide a confidence interval around the endpoint sensitivity analysis based on a range of in-  
109 breeding costs to fecundity. Gene drive success in 10 years is highly dependent on low selfing  
110 rate, though slower establishment is possible at moderate selfing rates. The inflection point near  
111  $\sigma = 0.6$  gives the value over which gene drive success is improbable in a 10 year window (Fig.  
112 2B). These results indicate that for species with a lower rate of selfing, including *Oncomelania*  
113 *hupensis*, *Biomphalaria glabrata*, and *Bulinus globosus*, gene drive could establish rapidly in  
114 focus populations [38]. Conversely, for species like *Biomphalaria pfeifferi* or *Bulinus trunca-*  
115 *tus*, which have been observed to self-fertilize at rates higher than 0.6, gene drive will likely be  
116 ineffective in increasing immunity in the snail population [39].

117 Drive success depends on features in the snail-human-schistosome system beyond selfing.  
118 Features intrinsic to the design and deployment of the drive like homing efficiency, fitness cost  
119 of the payload, resistance evolution, and the number of releases of GDMI individuals are more  
120 easily modified than extrinsic factors which are dependent on the ecological and environmental  
121 conditions – size of the snail population, force of infection from the human population, gene  
122 flow, and standing genetic variation. Yet the success of GDMI may be sensitive to any of these  
123 factors. We explore via endpoint sensitivity analyses how variation in these factors alters the

124 frequency of GDMI after 10 years.

125 Like results from previous modeling and laboratory studies, we find that homing efficiency  
126 has a dramatic impact on the outcome of the gene drive release in a focus population. Under the  
127 range of selfing scenarios, low homing efficiency leads to minimal gene drive establishment.  
128 Laboratory work in mosquitoes and mice shows homing efficiency above 0.4 is achievable and  
129 often exceeds 0.9 [5, 40]. In this range, diminishing returns are observed when  $H_c > 0.5$  (Fig.  
130 3A). The fitness cost of the genetic payload is not often empirically measured, though for this  
131 modeled system, gene drive success is highly sensitive to this parameter: GDMI can establish  
132 only when the cost is below 0.4 per gene drive copy in the genome (Fig. 3B). Results improve  
133 nearly linearly below a fitness cost of 0.3 per copy. In natural and laboratory populations,  
134 resistance to the gene drive mechanism can evolve quickly without the presence of multiple  
135 gRNA or selection against resistance formation [41]. Resistance can evolve more quickly when  
136 associated fitness costs of the gene drive phenotype are high. The reported mechanisms of  
137 resistance are spontaneous mutation and non-homologous end joining which render the Cas9  
138 cleavage site unrecognizable [42]. We combine these associated mechanisms and display the  
139 scenarios for the likely range of summed rates of both processes. In a 10-year time frame, a rate  
140 of resistance formation greater than 0.2 per meiotic event makes GDMI establishment infeasible  
141 (see also SI Fig. S1). With the exception of the deployment strategy, in which the number of  
142 releases does not significantly alter establishment drive success, intrinsic factors to the design  
143 of the gene drive construct bear heavily on the outcome of GDMI in 10 years.

144 We also investigated four extrinsic determinants of GDMI establishment: seed gene drive  
145 frequency, force of infection, gene flow, and the standing innate immunity in the snail pop-  
146 ulation. Seed frequency is critical to gene drive spread when only low seed frequencies are  
147 possible (Fig 3E). Seeding greater than 1% gives strong diminishing returns. As focus snail  
148 populations can vary between hundreds and hundreds of thousands of individuals, this implies

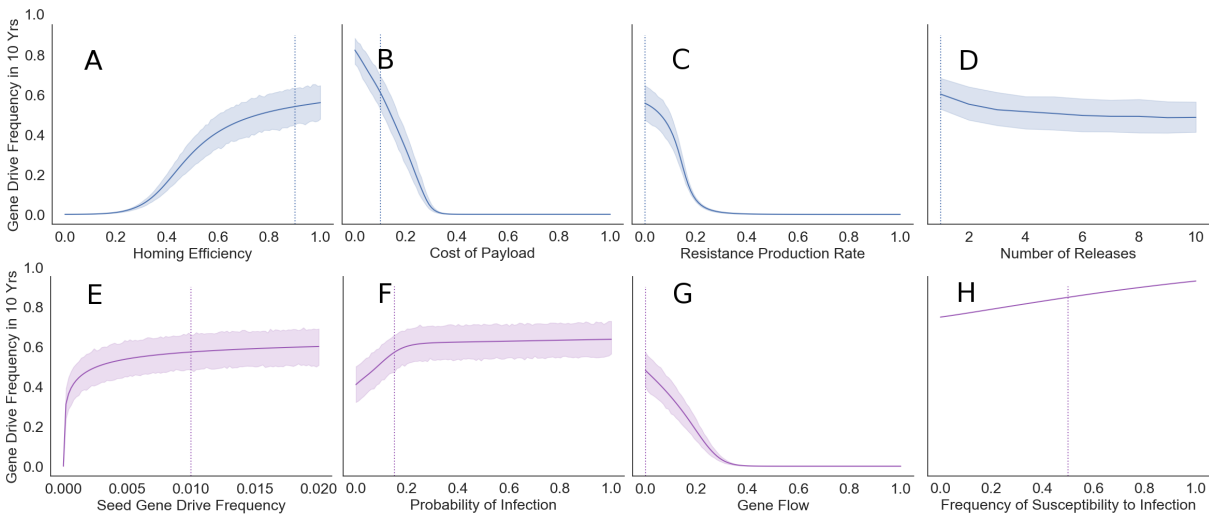

Figure 3: GDMI efficacy across a wide range of endemic conditions and genetic design. Bootstrapped 95% confidence intervals of the mean are reported on the range of results when the self-fertilization rate varies on the uniform distribution  $[0,1]$ . Intrinsic factors to the design and release that may be modified are in the top row in blue: (A) Gene drive homing efficiency (homing success per meiotic event), (B) fecundity cost of the genetic payload (relative fitness loss), (C) rate of production of gene drive resistant mutants (resistant mutants per meiotic event), (D) number of annual GDMI partial releases needed to achieve the size of a single maximum release (e.g. 5 = 1/5th release in each of the first 5 years). Extrinsic factors that are not readily modified are in the bottom row in purple: (E) seed frequency (i.e. proportion introduced in a single release at  $t = 0$ ) of the gene drive engineered snails in the population, (F) the probability a susceptible snail is infected in a generation, (G) bidirectional gene flow as the proportion of the focus population that is replaced by an external source each generation, and (H) starting frequency of snails susceptible to infection in focus the population. Because the frequency of the susceptible genotype is a function of selfing rate, bootstrapping is not appropriate for panel H. Vertical dotted lines depict the default parameter values used in the other figures. Note that the solid line represents a mean across uniformly distributed selfing values,  $\sigma \in [0, 1]$ , rather than the predicted results at  $\sigma = 0.5$ .

149 that anywhere from one to thousands of snails will need to be raised for a successful introduc-  
150 tion, and the size of the focus population will determine the feasibility of release. Similarly,  
151 diminishing returns are seen as the probability of infection in a generation increases past 0.2  
152 (Fig 3F). This indicator of endemicity provides the positive selection necessary to propagate  
153 the drive in the snail population, as susceptibility to infection is disadvantageous. These results  
154 suggest that success is similar for localities experiencing moderate or high burden of disease.  
155 Loss of drive alleles from the focus population due to migration inhibits establishment of the  
156 drive (Fig 3G). Levels of gene flow greater than 40% (i.e. 40% of focus population alleles  
157 are replaced by alleles from a non-evolving background population each generation) bring the  
158 drive alleles to undetectable levels assuming immigrants to the focus population lack gene drive  
159 immunity. Importantly, GDMI to schistosome infection acts by elevating the level of naturally  
160 occurring innate immunity in the snail population. This co-occurring immunity is positively  
161 selected under the same conditions as GDMI. Susceptibility is positively selected with weak  
162 force of infection due to the fitness costs via reduced egg viability associated with immunity,  
163 and immunity is positively selected with moderate to high force of infection due to fitness costs  
164 via parasitic castration and reduced lifespan in infected snails [43–45]. High levels of natural  
165 immunity will slow the growth of gene drive through direct competition, and therefore, higher  
166 susceptibility to infection in a population favors gene drive establishment (Fig 3H). Natural  
167 immunity is inherited more slowly, though fecundity for naturally immune snails is assumed  
168 higher than GDMI due to added costs of maintaining the genetic payload of the drive.

169 Although mass drug administration (MDA) is capable of temporary reduction in morbidity,  
170 MDA alone is incapable of local elimination at high transmission sites. In these conditions, gene  
171 drive offers a potentially promising avenue for coincident MDA and environmental treatment  
172 of schistosomiasis. We evaluate the consequences of applying GDMI snails to a community  
173 with concurrent annual MDA treatment. We compare the observed reduction in mean worm

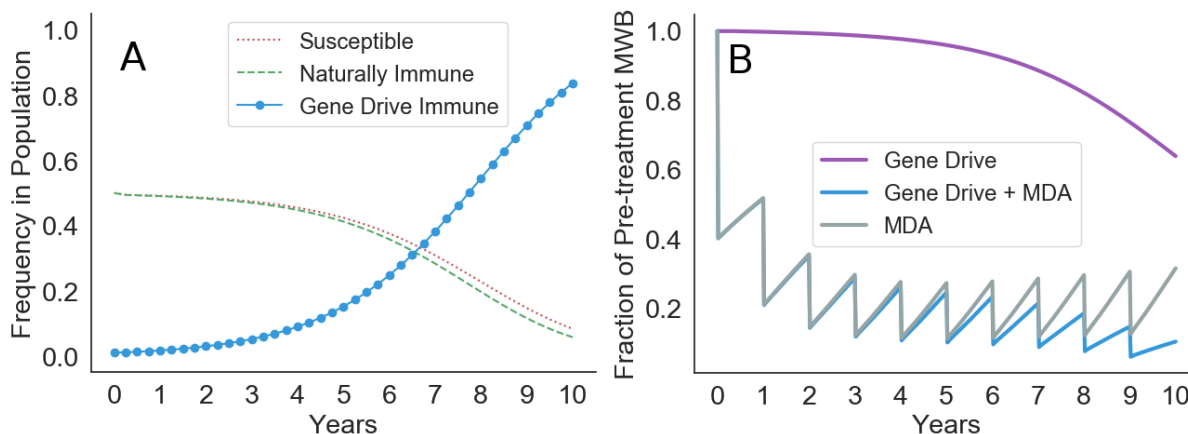

Figure 4: Combining gene drive with mass drug administration. (A) 35% reduction in MWB is observed in 10 years with gene drive alone. (B) Targeted administration of MDA at 60% annual reduction (efficacy\*coverage) in MWB results in more rapid but temporary reduction than the use of gene drive. Sustained reductions are achieved with coincident MDA and gene drive treatment.

174 burden (MWB) between three treatment regimes: gene drive immunity, MDA, and concurrent  
175 application of both (Fig. 4). Simulations are conducted under the same default conditions  
176 evaluated above with the difference that human-to-snail force of infection is a variable that is  
177 determined by the number of mated worm pairs in the human population (SI table 2). The pre-  
178 treatment prevalence of infection is assumed to be 80%. The snail-to-human force of infection  
179 is a function of the number of infected snails at a water access site, a quantity that diminishes  
180 as immunity to infection increases in the snail population.

181 With gene drive treatment alone a 35% reduction in MWB is observed due to the reduced  
182 establishment of new worms in humans and natural mortality of existing adult worms with  
183 average lifespan of nearly 5 years [46]. Elimination could be achieved with successful gene  
184 drive treatment alone, though the lifespan of adult schistosomes precludes rapid elimination  
185 (30 years required for 99% reduction, SI Fig. S14). With annual reduction of MWB of 60%  
186 through targeted MDA, alleviation is possible, but elimination is infeasible due to the persis-

187 tence of infected snails in nearby water access sites. Moreover, immunity in snails wanes due to  
188 decreased force of infection on the snail population, resulting in an upward trend in MWB from  
189 year 3 onward. Concurrent treatment targeting both snail and human hosts leads to sustained  
190 elimination provided resistance formation is low. This is true even when MDA is ended after  
191 10 years because GDMI has reached fixation in the focus snail population (SI Fig. S12-S14).

## 192 **Discussion**

193 Our results demonstrate that successful establishment of immunity within a 10 year evaluation  
194 period is possible for species of snails with low to moderate selfing rates. Snails species like  
195 *B. Pfeifferi* and *B. truncatus*, which are known to self-fertilize at high rates, are likely not  
196 desirable targets for GDMI. Many other snail species self-fertilize at lower rates, providing more  
197 opportunity for GDMI control of schistosomiasis [25]. Likewise, propensity to self-fertilize can  
198 also vary by environmental condition. Panmictic and stable snail populations favor out-crossing,  
199 which increases the rate of inheritance of GDMI. This work indicates that the potential for  
200 success of GDMI could be evaluated prior to program implementation through genetic studies  
201 quantifying selfing rates (e.g. with F-statistics) in intervention areas. In areas with sympatric  
202 snail species with differing selfing rates, quantifying the relative abundance of each species and  
203 their respective contributions to schistosomiasis burden will inform the potential for success of  
204 GDMI locally.

205 GDMI establishment is sensitive to genetic design and less sensitive to standing genetic  
206 variation for immunity. Low payload fitness costs and homing efficiency greater than 50% are  
207 essential. Reducing the evolution of resistance to the drive with multiple gRNAs [41] or through  
208 other techniques can moderately improve success in a 10 year window and has stronger impli-  
209 cations for success after 10 years. Alternative designs incorporating ‘daisy chain’ inheritance or  
210 other drive decay mechanisms can provide safeguards to gene drive release in natural ecosys-

211 tems, and peak GDMI frequency would be contingent on the strength of this decay, which  
212 occurs more quickly with fewer loci in the chain [23]. Selfing requires more loci in a daisy  
213 chain to achieve high peak frequencies of GDMI prior to decay, therefore this technology also  
214 will perform best for preferentially outcrossing species but will be ineffective for large snail  
215 populations (SI Fig. S2). Other genetic features like dominance, penetrance, and epistatic in-  
216 teractions are significant considerations for choosing appropriate gene targets (SI Fig. S4-S6).  
217 Although optimizing genetic designs is not trivial [47], because modifying snail habitat on a  
218 large scale is more challenging, efforts to improve drive construct designs will yield higher  
219 returns in successful establishment of GDMI.

220 Ecological factors that dilute the frequency of gene drive in a focus population (e.g. at a  
221 water access site), such as high gene flow due to snail migration or a large snail population  
222 size, inhibit timely establishment of gene drive mediated immunity (see also SI Fig. S8). These  
223 results indicate that success is most easily achieved in isolated water bodies with smaller snail  
224 populations. Snail population sizes in many areas fluctuate dramatically by season [48], there-  
225 fore introduction of GDMI snails may be best timed when population sizes are at their lowest  
226 and have maximum growth potential. Otherwise, GDMI will establish slowly in populations  
227 experiencing high seasonality (SI Fig. S10). Populations with shorter generation times will  
228 achieve greater GDMI frequencies within 10 years (SI Fig. S7). Future studies should build on  
229 this foundational simulation by considering snail migration and water flow between locations  
230 to assess whether GDMI snails would be effective in a wider range of scenarios.

231 There are some caveats and complexities that we have not addressed here. This model  
232 was built on the assumption that the gene drive works, i.e. that the gene drive is effective in  
233 producing snails that are immune to schistosome infection. While immune alleles associated  
234 with the PTC I and II gene clusters in *B. glabrata* can be rapidly selected in experimental  
235 conditions, these alleles have not yet been successfully deployed in a gene drive construct.

236 Further genetic work is required to discover gene drive targets in other snail host species. In  
237 addition, we have not considered potential interactions with other trematode species, as snails  
238 can be the intermediate hosts to species other than schistosomes [49]. Interactions between  
239 schistosomes, other trematode species, and immunity can shape the fitness landscape in which  
240 GDMI operates, and therefore require further investigation to gauge whether the efficacy of this  
241 gene drive approach is sensitive to these interactions. This equally applies to interactions that  
242 involve schistosome subtypes that may evade a single GDMI design. Field work to identify  
243 sympatric schistosome subtypes will be necessary to evaluate local deployment of GDMI.

244 These results indicate that the use of GDMI together with MDA could contribute to a longer-  
245 lasting reduction of worm burden than either GDMI or MDA alone. This emphasizes that  
246 gene drive is one potential tool among several that are currently available, and optimal use  
247 would likely be in conjunction with current control methods. GDMI is much more targeted  
248 than molluscicides, as it does not destroy the populations of snails and other aquatic life, and  
249 thus may be preferred by many stakeholders. Moving forward, it will be necessary to model  
250 how gene drives could interact with the variety of other control methods, to assess the optimal  
251 combination of methods and timing that would result in sustained elimination.

252 Modeling is crucial to understand the feasibility of implementing a new technology like gene  
253 drive, particularly in a natural system. Although this technology represents a new frontier for  
254 controlling disease, pests, and invasive species, the spread of designed genes in a natural setting  
255 can carry serious ethical and practical implications [36, 50]. It is therefore prudent to begin any  
256 considerations with *in silico* and *in vitro* studies, before proceeding to *in vivo*, with earlier steps  
257 informing the next. Further, modeling can ground critical deliberations amongst stakeholders  
258 by providing realistic predictions for the effects of a gene drive project and provide a useful  
259 ability to rapidly perform new simulations to address questions that stakeholders might have  
260 for gene drive developers [51]. This model is an advancement towards a biologically realistic



261 simulation which integrates population genetics, epidemiology, and population dynamics, and  
 262 can serve as a template for future work in gene drive feasibility analysis.

## 263 **Materials and Methods**

### 264 **Population Genetic Model**

We present a model of mixed mating strategy and explore a range of observed selfing rates to understand how reproduction strategy influences success of gene drive technology in a natural population. The gene drive model developed embeds a non-stationary Markov process that accounts for natural inheritance patterns as well as gene drive inheritance and fitness differences among genotypes. In contrast to previous gene drive models, which consider a wildtype allele and gene drive allele, we consider an expanded model with two wildtype alleles: susceptible ( $A$ ) and immune ( $B$ ). A third allele,  $B_g$ , represents engineered immunity to infection in the form of a gene drive construct. The set of six genotypes formed by these three alleles is  $\Omega = \{AA, AB, BB, AB_g, BB_g, B_gB_g\}$ . Let  $P_i$  be the frequency of each genotype where  $i \in \Omega$ . Let  $\mathbf{P}_t$  be the row vector composed of genotype frequencies at time (in generations)  $t$ . We describe the mixed mating system of genetic inheritance with two transition matrices,  $\mathbf{S}$  (self-fertilization) and  $\mathbf{T}$  (out-crossing), to describe the transitional probabilities from generation  $t$  to  $t + 1$ .

$$\mathbf{S} = \begin{pmatrix} 1 & 0 & 0 & 0 & 0 & 0 \\ \frac{1}{4} & \frac{1}{2} & \frac{1}{4} & 0 & 0 & 0 \\ 0 & 0 & 1 & 0 & 0 & 0 \\ \frac{1}{4} & 0 & 0 & \frac{1-H}{2} & 0 & \frac{H}{2} + \frac{1}{4} \\ 0 & 0 & \frac{1}{4} & 0 & \frac{1-H}{2} & \frac{H}{2} + \frac{1}{4} \\ 0 & 0 & 0 & 0 & 0 & 1 \end{pmatrix} \quad (1)$$

$$\mathbf{T} = \begin{pmatrix} P_A & P_B & 0 & (1-H)P_{B_g} & 0 & HP_{B_g} \\ \frac{P_A}{2} & \frac{P_A+P_B}{2} & \frac{P_B}{2} & \frac{(1-H)P_{B_g}}{2} & \frac{(1-H)P_{B_g}}{2} & HP_{B_g} \\ 0 & P_A & P_B & 0 & (1-H)P_{B_g} & HP_{B_g} \\ \frac{P_A}{2} & \frac{P_B}{2} & 0 & \frac{(1-H)(P_{B_g}+P_A)}{2} & \frac{(1-H)P_B}{2} & \frac{H+P_{B_g}}{2} \\ 0 & \frac{P_A}{2} & \frac{P_B}{2} & \frac{(1-H)P_A}{2} & \frac{(1-H)(P_B+P_{B_g})}{2} & \frac{H+P_{B_g}}{2} \\ 0 & 0 & 0 & (1-H)P_A & (1-H)P_B & P_{B_g}(1-H)+H \end{pmatrix} \quad (2)$$

265 Homing efficiency  $H$  takes values between 0 (Mendelian inheritance) and 1 (complete fi-  
 266 delity of gene drive mechanism). A matrix  $\mathbf{Q}$  can be formed to represent the mixed mating  
 267 system with self-fertilization rate and cost of inbreeding given by  $\sigma, \xi \in [0, 1]$ , respectively.

$$\mathbf{Q} = \sigma(1 - \xi)\mathbf{S} + (1 - \sigma)\mathbf{T} \quad (3)$$

268 In the absence of population dynamics and fitness differences between genotypes, equation (4)  
 269 would suffice to describe genotype frequency changes over time.

$$\mathbf{P}_{t+1} = \mathbf{P}_t\mathbf{Q} \quad (4)$$

270 To accurately represent the evolution of traits in the snail-schistosome system, we relax these  
 271 simplifying assumptions by incorporating fitness differences in response to viability and fecun-  
 272 dity selection. We also introduce overlapping generations with density dependent recruitment  
 273 in the snail population (SI Eqns. S1-S45). Model simulations recapitulate laboratory results  
 274 under the same conditions (SI Fig. S3). We derive analytical solutions at long term equilibrium  
 275 (SI Eqns. S46-S55) and analyze the evolution of resistance to the gene drive mechanism (SI  
 276 Eqns. S56-S58). The model is expanded to simulate the effects of ‘daisy chain’ drive (SI Fig.  
 277 S2, Eqns. S59-S68), and invasion analysis is performed for key variables, while a stochastic  
 278 model is used to observe extinction conditions (SI Fig. S9, Eqns. S69-S71).

## 279 Epidemiological Model

280 The genetic model is integrated with an epidemiological model of schistosomiasis through the  
 281 fraction of immunity in the snail population,  $\rho$ .

$$\frac{dw}{dt} = \alpha y - \mu w \quad (5)$$

$$\frac{dy}{dt} = \Lambda^*(1 - e^{-\beta w})(1 - y - \rho) - vy \quad (6)$$

282  $\alpha$  and  $\beta$  are transmission rates governing the conversion of snail infection prevalence,  $y$ , to adult  
283 worms,  $w$ , in humans and vice versa. Gurarie et al. outlined the transmission from humans to  
284 snails is saturating with increasing worm burden [52]. The asymptote is the pre-treatment force  
285 of infection,  $\Lambda^*$ .  $\mu$  and  $v$  are the death rates of adult worms and infected snails, respectively.

286 Equations (5) and (6) are integrated in 3 month intervals, corresponding to the expected  
287 generation time of the snail population. The probability of a new infection per susceptible snail  
288 in a generation determines the strength of selection for immunity in the genetic model.

$$Pr(y^+) \approx \int_{t=\tau}^{\tau+1} \Lambda^*(1 - e^{-\beta w}) dt \quad (7)$$

289 Parameter values and initial endemic conditions are detailed in SI tables 1 and 2. Calcula-  
290 tions for equilibrium values and reproduction numbers are made in SI Eqns. S72-S91. The  
291 epidemiological model was not used to simulate figures 2 and 3. Instead, the probability of new  
292 infections was held constant at the equilibrium value calculated for endemic conditions with  
293 the integrated genetic and epidemiological model (SI Fig. S11). Figure 4 incorporates both  
294 dynamic models to evaluate single and paired treatment. MDA is modeled as instantaneous  
295 annual treatment. Percent reduction in worm burden during each treatment was 60% and is the  
296 product of coverage and efficacy.

297 Python code for simulations is available at [www.github.com/grewelle/ModelGeneDriveSchisto](http://www.github.com/grewelle/ModelGeneDriveSchisto).

## 298 **Acknowledgments**

299 We thank members of the De Leo lab and ECHO laboratory (Ecole Polytechnique Fédérale  
300 de Lausanne) for continued support in this work. We also thank John Pringle for insightful  
301 comments on this work. REG is funded by the Stanford Graduate Fellowship, ARCS Fellow-  
302 ship, and the Stanford-EPFL exchange fellowship. **Conflicts of Interest:** JT and EKON were  
303 seed funded by the Merck Innovation Cup 2016 for research on schistosomiasis, and previously  
304 employed as external consultants to the Global Health Institute of Merck (KGaA) which pro-  
305 duces treatments for schistosomiasis. REG and GADL were partially supported by the National  
306 Science Foundation's grants DEB-2011179 and ICER-2024383.

## 307 **Author Contributions**

308 R.E.G, J.P.S.,J.T., E.K.O.N. conceived the research; R.E.G. performed the research; R.E.G  
309 wrote the paper; and R.E.G., J.P.S, J.T. E.K.O.N., C.G.R., G.A.D.L edited the paper.

# Supplement

## Population genetic model

The evolution of a focal population seeded with gene drive mediated immune (GDMI) snails is described in rudimentary form in the main text with transition matrix  $Q$ . This describes a system of inheritance where a susceptible and immune allele are present in the population, and the GDMI allele exhibits the same immunity as the naturally occurring immunity. The three alleles form six distinct genotypes in a diploid species.  $Q$  represents random mating with no selection and full population replacement each generation. In a natural system assortative mating, selection, and iteroparity are known to occur. Because assortative mating as a function of innate immunity to schistosome infection has not yet been demonstrated in host snail species, we maintain this assumption in our population genetic model. However, because several modes of selection are described for this immunity and iteroparity produces overlapping generations, other assumptions for  $Q$  must be relaxed to accurately reflect the evolutionary dynamics of the snails. Viability and fecundity selection are separately accounted in their contribution the fitness of each genotype, as their relative importance in determining the rate of evolution changes with the model of population dynamics and replacement.

## Birth-death process

Snail recruitment is density-dependent. Adult lifespan extends past the mean generation time, allowing for nearly continuous reproduction after sexual maturity. We assume that background mortality is density-independent and that the population replacement rate is modulated by changes in mortality rate provided density-dependent recruitment is sufficient to for full replacement. In contrast to a population model described by reproduction proceeded by culling to a carrying capacity, we model snail population dynamics with culling proceeded by repro-

333 duction to a carrying capacity. The sub-population size of genotype  $i$  is described through time  
334 with the two step process: (1) death and migration yield the reproducing population of genotype  
335  $i$ ,  $\bar{N}_i(t)$ , which (2) give birth to offspring according to equation 2.

$$\bar{N}_i(t) = N_i(t)[1 - \gamma_i(t) + m_i(t)] \quad (1)$$

$$N_i(t+1) = \bar{N}_i(t) + \frac{\lambda_i(t)}{\lambda(t)} [G(\bar{N}(t), \lambda(t), t) - \bar{N}(t)] \quad (2)$$

336 where  $N_i(t)$  is the genotype sub-population size in generation  $t$ ,  $\gamma_i(t)$  is the fractional mor-  
337 tality in generation  $t$ ,  $m_i(t)$  is the fractional net migration in or out of the focal population  
338 in generation  $t$ ,  $\lambda_i(t)$  is the partial finite growth of genotype  $i$  after mortality and migration,  
339 and  $\lambda(t)$  is the maximum total finite growth of the population. Because deaths are separately  
340 accounted in this birth-death process, here  $\lambda(t)$  resembles fecundity (i.e. when mortality is ab-  
341 sent, fecundity and finite population growth are equivalent).  $G(\bar{N}(t), \lambda(t), t)$  is the discrete time  
342 population growth function which describes total population growth. We use a logistic growth  
343 function in the simulations throughout the main text and supplement.

$$G(\bar{N}(t), \lambda(t), t) = \frac{\bar{N}(t)K}{\bar{N}(t) + (K - \bar{N}(t))e^{-\lambda(t)}} \quad (3)$$

## 344 **Viability selection**

345 Viability selection on immunity to schistosome infection is incorporated in the fractional mor-  
346 tality term,  $\gamma_i(t)$ , which is a function of background mortality (neutral) and loss from the re-  
347 productive population through infection (directional selection), which has been demonstrated  
348 to substantially increase mortality and castrate snails. For these two reasons, we assume that  
349 infected snails are removed from the reproducing population. Reproductive compensation has  
350 been observed for snails exposed to miracidia, whereby these snails produce offspring at higher

351 rates following exposure. This could counter lost reproduction after infection. However, a  
352 genetic link between reproductive compensation and immunity has not yet been shown. There-  
353 fore, we assume that the mechanism of reproductive compensation is phenomenological, being  
354 linked to exposure but not patent infection, rather than linked to host genetics, and does not  
355 produce fitness differences between genotypes. Explicitly, we write  $\gamma_i(t)$  as

$$\gamma_i(t) = d + (1 - d)Pr(y^+)(1 - h\iota) \quad (4)$$

356  $d$  is the adult background mortality per snail in a generation.  $Pr(y^+)$  is the per snail proba-  
357 bility of acquiring a new infection.  $h$  is the dominance coefficient, which takes values between  
358 0 and 1, with a value of 0.5 indicating co-dominance and a value of 1 indicating complete dom-  
359 inance of the immune allele over the susceptible allele.  $\iota \in [0, 1]$  is the degree of immunity  
360 conferred by the immune allele compared to the susceptible allele. Genetically, this value can  
361 be equated to the penetrance of innate immunity. A value of 0 indicates no additional immunity,  
362 while a value of 1 indicates full immunity. The loss of reproductive individuals from the pop-  
363 ulation contributed by infection compared to the background mortality determines the strength  
364 of viability selection for immunity in the population.

## 365 **Fecundity selection**

366 Inbreeding and immunity are known to negatively impact reproductive success in host snail  
367 populations. Inbreeding can reduce fecundity and egg viability, while immunity is associated  
368 with low egg viability [53, 54]. Because the population model tracks reproductive individuals,  
369 and recruitment of offspring to the reproductive class is density-dependent, offspring viability  
370 can be treated as a component of fecundity. Using the broad definition of fecundity as the  
371 offspring surviving to adulthood, we institute fecundity costs for inbreeding by self-fertilization  
372 and for maintenance of immune alleles. Cost of immune maintenance,  $C$ , is directly related

373 to the phenotype and is dose-independent (i.e. 2 immune alleles are not more costly than 1  
374 immune allele with full dominance). An additional cost,  $C_g$ , is associated with maintenance of  
375 the genetic payload in the drive construct. This cost is dose-dependent; gene drive homozygotes  
376 carry a two-fold cost compared to heterozygotes. Let the set of alleles  $\{A, B, B_g\}$  be indexed  
377 as  $\{1, 2, 3\}$ . The fecundity of each genotype,  $f_i$ , can be represented as:

$$f_{11} = f_{AA} \quad (5)$$

$$f_{12} = f_{11}(1 - hC) \quad (6)$$

$$f_{22} = f_{11}(1 - C) \quad (7)$$

$$f_{13} = f_{11}(1 - hC - C_g) \quad (8)$$

$$f_{23} = f_{11}(1 - C - C_g) \quad (9)$$

$$f_{33} = f_{11}(1 - C - 2C_g) \quad (10)$$

378 The inbreeding cost is not directly associated with a specific genotype, but rather is incor-  
379 porated as  $\xi \in [0, 1]$  in the calculation of  $Q$  (equation 3 main text):

$$Q = \sigma(1 - \xi)S + (1 - \sigma)T \quad (11)$$

380 Although  $\xi$  is a cost not directly applied to any genotype, because it is a cost of inbreeding  
381 due to self-fertilization and self-fertilization produces homozygotes with higher frequency than  
382 outcrossing, this cost reduces the fitness of homozygotes relative to heterozygotes when selfing  
383 is common in the population. Inbreeding is assumed to only affect the F1 generation of selfing  
384 parents, and associated costs are not separately tracked through descent in future generations.  
385 This treatment is reasonable for a sufficient degree of outcrossing which mixes lineages in the  
386 population. Highly inbred snail populations are shown to be insensitive to inbreeding depression  
387 caused by selfing, presumably due to purging of deleterious alleles from the gene pool, and



Table 1: Default parameter values for the genetic model

| Parameter     | Description                                       | Value                                                                                  | Ref.                                                                                                         |
|---------------|---------------------------------------------------|----------------------------------------------------------------------------------------|--------------------------------------------------------------------------------------------------------------|
| $d$           | background mortality per generation               | 0.5                                                                                    | calculated with reference to <i>B. pfeifferi</i> [55, 56]                                                    |
| $h$           | dominance coefficient for immune allele           | 1                                                                                      | supported by Fig. S3 and [57]                                                                                |
| $Pr(y^+)$     | probability of infection per generation           | 0.15                                                                                   | derived from epidemiological model (equ. S83)                                                                |
| $\iota$       | penetrance of immunity                            | 0.8                                                                                    | [53]                                                                                                         |
| $C$           | cost of immunity                                  | 0.2835                                                                                 | model-derived to yield symmetric selection for and against immunity, stabilizing the phenotypic ratio at 1:1 |
| $C_g$         | cost of payload per copy                          | 0.1                                                                                    | [58] variable/theoretical                                                                                    |
| $\xi$         | cost of inbreeding                                | 0.3                                                                                    | [59] highly variable                                                                                         |
| $H$           | homing efficiency                                 | 0.9                                                                                    | [60]                                                                                                         |
| $\sigma$      | selfing frequency                                 | 0.5                                                                                    | [59] highly variable                                                                                         |
| $f_{AA}$      | per generation fecundity of a susceptible snail   | 20                                                                                     | [53]                                                                                                         |
| $P_{AA}(t=0)$ | natural initial frequency of susceptible genotype | 0.5                                                                                    | [53, 57]                                                                                                     |
| $P_A(t=0)$    | natural initial frequency of allele A             | $\frac{\sigma - \sqrt{16P_{AA} - 24\sigma P_{AA} + \sigma^2(1+8P_{AA})}}{4(\sigma-1)}$ | calculated for a given $\sigma$                                                                              |
| $P_B(t=0)$    | natural initial frequency of allele B             | $1-P_A$                                                                                | calculated for a given $\sigma$                                                                              |
| $P_{AB}(t=0)$ | natural initial frequency of heterozygote         | $\frac{4P_AP_B(1-\sigma)}{2-\sigma}$                                                   | calculated for a given $\sigma$                                                                              |
| $P_{BB}(t=0)$ | natural initial frequency of immune genotype      | $\frac{P_B^2 + P_AP_B\sigma}{2-\sigma}$                                                | calculated for a given $\sigma$                                                                              |

388 therefore inbreeding costs are low in the absence of outcrossing. Table S1 gives parameter  
 389 values used in the genetic model, many of which are known to vary by species or even by  
 390 population and environmental conditions. Values were chosen to be centered in the range of  
 391 observed values with references given to empirical measurements. Results can differ by system,  
 392 and the endpoint sensitivity analyses in Fig. 2 and 3 of the main text provide indication of the  
 393 most sensitive parameters.

394 The Markov process described in the main text with equations 3 and 4 represents a semel-  
 395 parous population that reproduces once per generation, and adults are completely replaced by

396 offspring with no consideration for fitness differences between genotypes. Instead, however,  
 397 snail host populations reproduce continuously with overlapping generations. We devise a mod-  
 398 ified Markov process to describe these evolutionary dynamics, incorporating the fitness differ-  
 399 ences detailed above in equations S5-S10. We consider the modified transition matrices:

$$\bar{\mathbf{S}} = \begin{pmatrix} f_{11} & 0 & 0 & 0 & 0 & 0 \\ \frac{f_{12}}{4} & \frac{f_{12}}{2} & \frac{f_{12}}{4} & 0 & 0 & 0 \\ 0 & 0 & f_{22} & 0 & 0 & 0 \\ \frac{f_{13}}{4} & 0 & 0 & \frac{f_{13}(1-H)}{2} & 0 & f_{13}\left(\frac{H}{2} + \frac{1}{4}\right) \\ 0 & 0 & \frac{f_{23}}{4} & 0 & \frac{f_{23}(1-H)}{2} & \frac{f_{23}H}{2} + \frac{f_{23}}{4} \\ 0 & 0 & 0 & 0 & 0 & f_{33} \end{pmatrix} \quad (12)$$

$$\bar{\mathbf{T}} = \begin{pmatrix} a_{11} & a_{12} & 0 & a_{14} & 0 & a_{16} \\ a_{21} & a_{22} & a_{23} & a_{24} & a_{25} & a_{26} \\ 0 & a_{32} & a_{33} & 0 & a_{35} & a_{36} \\ a_{41} & a_{42} & 0 & a_{44} & a_{45} & a_{46} \\ 0 & a_{52} & a_{53} & a_{54} & a_{55} & a_{56} \\ 0 & 0 & 0 & a_{64} & a_{65} & a_{66} \end{pmatrix} \quad (13)$$

$$a_{11} = f_{11}P_{11} + \frac{(f_{11} + f_{12})P_{12} + (f_{11} + f_{13})P_{13}}{4} \quad (14)$$

$$a_{12} = \frac{(f_{11} + f_{22})P_{22}}{2} + \frac{(f_{11} + f_{12})P_{12} + (f_{11} + f_{23})P_{23}}{4} \quad (15)$$

$$a_{14} = (1 - H)\left(\frac{(f_{11} + f_{33})P_{33}}{2} + \frac{(f_{11} + f_{13})P_{13} + (f_{11} + f_{23})P_{23}}{4}\right) \quad (16)$$

$$a_{16} = H\left(\frac{(f_{11} + f_{33})P_{33}}{2} + \frac{(f_{11} + f_{13})P_{13} + (f_{11} + f_{23})P_{23}}{4}\right) \quad (17)$$

$$a_{21} = \frac{(f_{11} + f_{12})P_{11}}{4} + \frac{2f_{12}P_{12} + (f_{12} + f_{13})P_{13}}{8} \quad (18)$$

$$a_{22} = \frac{(f_{11} + f_{12})P_{11} + 2f_{12}P_{12} + (f_{12} + f_{22})P_{22}}{4} + \frac{(f_{12} + f_{13})P_{13} + (f_{12} + f_{23})P_{23}}{8} \quad (19)$$

$$a_{23} = \frac{(f_{12} + f_{22})P_{22}}{4} + \frac{2f_{12}P_{12} + (f_{12} + f_{23})P_{23}}{8} \quad (20)$$

$$a_{24} = (1 - H)\left(\frac{(f_{12} + f_{33})P_{33}}{4} + \frac{(f_{12} + f_{13})P_{13} + (f_{12} + f_{23})P_{23}}{8}\right) \quad (21)$$

$$a_{25} = (1 - H)\left(\frac{(f_{12} + f_{33})P_{33}}{4} + \frac{(f_{12} + f_{13})P_{13} + (f_{12} + f_{23})P_{23}}{8}\right) \quad (22)$$

$$a_{26} = H\left(\frac{(f_{12} + f_{33})P_{33}}{4} + \frac{(f_{12} + f_{13})P_{13} + (f_{12} + f_{23})P_{23}}{8}\right) \quad (23)$$

$$a_{32} = \frac{(f_{11} + f_{22})P_{11}}{2} + \frac{(f_{22} + f_{12})P_{12} + (f_{22} + f_{13})P_{13}}{4} \quad (24)$$

$$a_{33} = f_{22}P_{22} + \frac{(f_{22} + f_{12})P_{12} + (f_{22} + f_{23})P_{23}}{4} \quad (25)$$

$$a_{35} = (1 - H)\left(\frac{(f_{22} + f_{33})P_{33}}{2} + \frac{(f_{22} + f_{13})P_{13} + (f_{22} + f_{23})P_{23}}{4}\right) \quad (26)$$

$$a_{36} = H\left(\frac{(f_{22} + f_{33})P_{33}}{2} + \frac{(f_{22} + f_{13})P_{13} + (f_{22} + f_{23})P_{23}}{4}\right) \quad (27)$$

$$a_{41} = \frac{(f_{11} + f_{13})P_{11}}{4} + \frac{(f_{12} + f_{13})P_{12} + 2f_{13}P_{13}}{8} \quad (28)$$

$$a_{42} = \frac{(f_{13} + f_{22})P_{22}}{4} + \frac{(f_{12} + f_{13})P_{12} + (f_{13} + f_{23})P_{23}}{8} \quad (29)$$

$$a_{44} = (1 - H)\left(\frac{(f_{13} + f_{11})P_{11} + 2f_{13}P_{13} + (f_{13} + f_{33})P_{33}}{4} + \frac{(f_{13} + P_{12})P_{12} + (f_{13} + f_{23})P_{23}}{8}\right) \quad (30)$$

$$a_{45} = (1 - H)\left(\frac{(f_{13} + f_{22})P_{22}}{4} + \frac{(f_{12} + f_{13})P_{12} + (f_{13} + f_{23})P_{23}}{8}\right) \quad (31)$$

$$a_{46} = H\left(\frac{(f_{13} + f_{11})P_{11} + (f_{13} + f_{12})P_{12} + (f_{13} + f_{22})P_{22} + 2f_{13}P_{13} + (f_{13} + f_{23})P_{23} + (f_{13} + f_{33})P_{33}}{4}\right) + \quad (32)$$

$$\frac{2(f_{13} + f_{33})P_{33} + 2f_{13}P_{13} + (f_{23} + f_{13})P_{23}}{8} \quad (33)$$

$$a_{52} = \frac{(f_{11} + f_{23})P_{11}}{4} + \frac{(f_{12} + f_{23})P_{12} + (f_{23} + f_{13})P_{13}}{8} \quad (34)$$

$$a_{53} = \frac{(f_{23} + f_{22})P_{22}}{4} + \frac{(f_{23} + f_{12})P_{12} + 2f_{23}P_{23}}{8} \quad (35)$$

$$a_{54} = (1 - H)\left(\frac{(f_{11} + f_{23})P_{11}}{4} + \frac{(f_{12} + f_{23})P_{12} + (f_{23} + f_{13})P_{13}}{8}\right) \quad (36)$$

$$a_{55} = (1 - H)\left(\frac{(f_{23} + f_{22})P_{22} + (f_{23} + f_{33})P_{33} + 2f_{23}P_{23}}{4} + \frac{(f_{23} + f_{12})P_{12} + (f_{23} + f_{13})P_{13}}{8}\right) \quad (37)$$

$$a_{56} = H\left(\frac{(f_{23} + f_{11})P_{11} + (f_{23} + f_{12})P_{12} + (f_{23} + f_{22})P_{22} + (f_{13} + f_{23})P_{13} + 2f_{23}P_{23} + (f_{23} + f_{33})P_{33}}{4}\right) + \quad (38)$$

$$\frac{2(f_{23} + f_{33})P_{33} + (f_{13} + f_{23})P_{13} + 2f_{23}P_{23}}{8}$$

$$a_{64} = (1 - H)\left(\frac{(f_{11} + f_{33})P_{11}}{2} + \frac{(f_{33} + f_{12})P_{12} + (f_{33} + f_{13})P_{13}}{4}\right) \quad (39)$$

$$a_{65} = (1 - H)\left(\frac{(f_{22} + f_{33})P_{22}}{2} + \frac{(f_{33} + f_{12})P_{12} + (f_{33} + f_{23})P_{23}}{4}\right) \quad (40)$$

$$a_{66} = \frac{H}{2}\left((f_{11} + f_{33})P_{11} + (f_{12} + f_{33})P_{12} + (f_{22} + f_{33})P_{22} + \frac{(f_{13} + f_{33})P_{13}}{2} + \frac{(f_{23} + f_{33})P_{23}}{2}\right) + \quad (41)$$

$$\frac{(f_{13} + f_{33})P_{13} + (f_{23} + f_{33})P_{23}}{4} + f_{33}P_{33}$$

400 Modifying the equation for  $\mathbf{Q}$  in the main text to reflect the incorporation of demography  
401 and fitness differences between genotypes, we achieve:

$$\bar{\mathbf{Q}} = \sigma(1 - \xi)\bar{\mathbf{S}} + (1 - \sigma)\bar{\mathbf{T}} \quad (42)$$

402 The vector of genotype frequencies at time  $t$  is denoted  $\mathbf{P}(t)$ .  $P_i(t)$  represents the frequency  
403 of genotype  $i$  at time  $t$ . The vector of partial growth rates is  $\boldsymbol{\lambda}(t)$ :

$$\lambda(t) = \mathbf{P}(t)\bar{\mathbf{Q}}(t) \quad (43)$$

404 and the sum of the elements of this vector is  $\lambda(t)$ :

$$\lambda(t) = \sum_{i=1}^6 \lambda_i(t) \quad (44)$$

405 These values can be substituted in equation S2 to track the evolution of the population.

### 406 **Establishing initial genetic conditions**

407 Prior to deploying GDMI snails in a naive population, the standing background genetic variation  
 408 for susceptibility to infection has some influence over the success of GDMI. The two forms of  
 409 genetic variation that are important to consider are: the frequency of susceptibility and the  
 410 distribution of the susceptible allele across the genotypes. High self-fertilization frequencies  
 411 favor homozygous populations, which exposes the susceptible allele to selection (assuming  
 412 it is recessive). Several studies have measured susceptibility empirically through challenge  
 413 experiments in laboratory conditions. Snail populations that are not far removed from a natural  
 414 parental lineage demonstrate intermediate levels of susceptibility, though these results vary with  
 415 miracidial dosing. For simplicity we fix the standing natural frequency of susceptibility at  
 416 0.5. The immune phenotype is, therefore, at 0.5 frequency as well in our idealized starting  
 417 conditions. In a mixed-mating system, which these snails exhibit, the distribution of the *A* and  
 418 *B* alleles across the three genotypes is modulated by selfing frequency. The transition matrix  
 419 describing the evolution of the three naturally occurring genotypes is

$$\mathbf{Q}_{natural} = \begin{pmatrix} \sigma + (1 - \sigma)P_A & (1 - \sigma)P_B & 0 \\ \frac{\sigma}{4} + \frac{(1-\sigma)P_A}{2} & \frac{\sigma}{2} + \frac{(1-\sigma)(P_A+P_B)}{2} & \frac{\sigma}{4} + \frac{(1-\sigma)P_B}{2} \\ 0 & (1 - \sigma)P_A & \sigma + (1 - \sigma)P_B \end{pmatrix} \quad (45)$$

420 Here we denote  $P_A$  and  $P_B$  as the allele frequencies, and  $P_{11}(t)$ ,  $P_{12}(t)$ ,  $P_{22}(t)$  as the geno-  
 421 type frequencies at time  $t$ . To establish initial genetic conditions, we find the equilibrium geno-  
 422 type frequencies given a frequency of self-fertilization. We assume that the genotype frequen-  
 423 cies are the result of selection but that otherwise selection is not stronger than the equilibrium  
 424 behavior of the transition matrix under neutral conditions. Therefore, genotype frequencies can  
 425 be solved given the frequency of the susceptible genotype. Equilibrium behavior of this transi-  
 426 tion matrix is strong, with genotype frequencies approaching equilibrium geometrically so that  
 427 equilibrium is effectively reached within 2 generations. In the absence of imposed selection, the  
 428 allele frequencies remain constant through each generation despite the changing genotype fre-  
 429 quencies. This is the reason genotype frequencies are represented as functions of time above,  
 430 while allele frequencies are not. From matrix multiplication, we know the frequency of the  
 431 susceptible genotype in the next generation using  $\mathbf{Q}_{natural}$  is:

$$\begin{aligned}
 P_{11}(t+1) &= P_{11}(t)(\sigma + (1-\sigma)P_A) + P_{12}(t)\left(\frac{\sigma}{4} + \frac{(1-\sigma)P_A}{2}\right) & (46) \\
 &= (1-\sigma)P_A^2 + \sigma\left(P_{11}(t) + \frac{P_{12}(t)}{4}\right) \\
 &= P_A^2 + \sigma P_A P_B - \frac{\sigma P_{12}(t)}{4}
 \end{aligned}$$

432 Solving the difference equation yields:

$$P_{11}(t+1) = P_A^2 + \sigma P_A P_B \left(1 - \frac{1-\sigma}{2-\sigma} \left(1 - \left(\frac{\sigma}{2}\right)^t\right)\right) - \frac{\sigma P_{12}(0)}{4} \left(\frac{\sigma}{2}\right)^t \quad (47)$$

433 The limiting distribution of genotype frequencies can be solved as  $t \rightarrow \infty$ . For the suscep-  
 434 tible genotype, this gives:

$$P_{11}(\infty) = P_A^2 + \frac{\sigma P_A P_B}{2-\sigma} \quad (48)$$

435 The same derivations can be performed for the other two genotype frequencies from the  
 436 transition matrix to achieve the limiting distribution.

$$P_{12}(t+1) = P_{11}(t)(1-\sigma)P_B + P_{12}(t)\left(\frac{\sigma}{2} + \frac{(1-\sigma)(P_A + P_B)}{2}\right) + P_{22}(t)(1-\sigma)P_A \quad (49)$$

$$= 2(1-\sigma)P_AP_B + \frac{\sigma P_{12}(t)}{2}$$

$$P_{22}(t+1) = P_{12}(t)\left(\frac{\sigma}{4} + \frac{(1-\sigma)P_B}{2}\right) + P_{22}(t)(\sigma + (1-\sigma)P_B) \quad (50)$$

$$= (1-\sigma)P_B^2 + \sigma\left(P_{22}(t) + \frac{P_{12}(t)}{4}\right)$$

437 The equilibrium values for the heterozygote and immune homozygote are:

$$P_{12}(\infty) = \frac{4P_AP_B(1-\sigma)}{2-\sigma} \quad (51)$$

$$P_{22}(\infty) = \frac{P_B^2 + P_AP_B\sigma}{2-\sigma} \quad (52)$$

438 These results differ from the results presented by Karlin [61] due to a presumed typograph-  
 439 ical error in his text. A population with 50% susceptible genotype at equilibrium is assumed  
 440 when GDMI snails are introduced (simulation  $t = 0$ ). Given that  $P_{11}(t = 0) = 0.5$ ,  $P_A$  can be  
 441 solved:

$$P_B = 1 - P_A \quad (53)$$

$$P_{11}(t = 0) = P_A^2 + \frac{\sigma P_A(1 - P_A)}{2 - \sigma} \quad (54)$$

$$P_A = \frac{\sigma - \sqrt{16P_{11}(t = 0) - 24\sigma P_{11}(t = 0) + \sigma^2(1 + 8P_{11}(t = 0))}}{4(\sigma - 1)} \quad (55)$$

$$P_A|_{P_{11}=0.5} = \frac{\sigma - \sqrt{8 - 12\sigma + 5\sigma^2}}{4(\sigma - 1)}$$

## 442 **Evolution of resistance**

443 Resistance to the drive mechanism can readily develop if the target sequence on the homolo-  
444 gous chromosome is mutated so as to be unrecognizable by guide RNA. This occurs primarily  
445 through non-homologous end joining (NHEJ), which is an alternative mechanism of double  
446 strand break repair that can occur instead of homology directed repair. Point mutations and  
447 standing genetic variation at the target locus can also result in resistance to the drive mecha-  
448 nism. Because NHEJ is a common repair pathway in most organisms, it is the primary producer  
449 of resistance in the population, especially as the drive construct increases in frequency in the  
450 population. Resistance formation via this pathway occurs due to misrepair after cleavage from  
451 the Cas nuclease and occurs proportionally to the number of cleavage events that occur in the  
452 population each generation. Homing efficiency is a function of the predominance of homol-  
453 ogy directed repair over NHEJ, though not every failed drive event is due to NHEJ. Homing  
454 efficiency at the population level declines as resistant alleles accumulate. Resistant alleles may  
455 represent a spectrum of mutations, and separately accounting for the variety of alleles and their  
456 respective fitness requires exponential expansion of the number of genotypes tracked in this  
457 genetic model. To simplify, we assume that resistant alleles are equivalent in fitness to their  
458 natural counterparts. This gives them a fecundity advantage to the drive allele, which carries an  
459 additional cost due to the genetic payload. In a randomly mating population, outcrossing events  
460 will randomly pair resistant alleles with each other, natural alleles, or the drive allele. The con-  
461 sequence of non-assortative mating is that the formation of resistant alleles is proportional to  
462 the number of gene drive heterozygotes produced due to failed homing. The number of gene  
463 drive heterozygotes (hybrids) produced each generation is:

$$N_{hybrids}(t) = \frac{\lambda_4(t) + \lambda_5(t)}{\lambda(t)} [G(\bar{N}(t), \lambda(t), t) - \bar{N}(t)] \quad (56)$$



464 The homing efficiency in generation  $t$  can be calculated from the maximum homing effi-  
465 ciency without NHEJ,  $H_0$ , at  $t = 0$  when resistant allele accumulation is lowest and determined  
466 only by background resistance due to standing genetic variation.

$$\begin{aligned} H(t) &= H_0(1 - R(t) - \nu(1 - R(t))) \\ &= H_0(1 - R(t))(1 - \nu) \end{aligned} \quad (57)$$

467  $R(t)$  is the frequency of resistant alleles in the pool of natural and resistant alleles (exclud-  
468 ing the drive allele).  $\nu$  is the per homing event rate of production of resistant alleles. If the  
469 population is in mutation-selection-drift balance, the rate of production is almost entirely due  
470 to NHEJ. The rate of accumulation of resistant alleles is the fraction of the total gene drive het-  
471 erozygotes (hybrids) produced that are resistant multiplied by the fraction of hybrids produced  
472 in the total population each generation.

$$\begin{aligned} R(t+1) &= R(t) + \frac{\nu(1 - R(t))N_{hybrids}(t)}{(1 - H(t) + \nu(1 - R(t)))N(t)} \\ &= R(t) + \frac{\nu(1 - R(t))N_{hybrids}(t)}{(1 - H_0(1 - R(t))(1 - \nu) + \nu(1 - R(t)))N(t)} \\ &= R(t) + \frac{\nu(1 - R(t))N_{hybrids}(t)}{(1 - (1 - R(t))(H_0(1 - \nu) + \nu))N(t)} \end{aligned} \quad (58)$$

473 Should mutations leading to resistance be deleterious compared to the respective naturally  
474 occurring alleles, resistance is expected to spread more slowly in the population than is depicted  
475 in Fig. 3 of the main text. Conversely, should mutations be beneficial, spread will occur more  
476 rapidly. The cost of resistance can be modulated by choosing neutral regions for lower cost  
477 and regions under strong selection for higher cost (e.g. ribosomal RNA genes). Fitness costs  
478 due to off-target CRISPR-induced mutations are possible, but experimental evidence indicates  
479 that the frequency of these mutations is low ( $\approx 2\%$ ). Moreover, these mutations do not exhibit

480 drive and are not related to the evolution of resistance. Off-target mutations can be reduced with  
481 properly specific gRNA design and restricted expression of the CAS9 protein. The influence of  
482 resistance evolution on the establishment of GDMI is explored in Fig. S1.

### 483 **Daisy chain loci**

484 Previous authors have proposed mechanisms to safeguard the spread and persistence of gene  
485 drives in wild populations. One prominent mechanism is known as a daisy drive, which bor-  
486 rows its name from the concept of a daisy chain in which elements are connected in a series.  
487 Daisy drives are split drives which split the drive element from the payload by positioning them  
488 on separate loci, ideally on different chromosomes for independent inheritance. Daisy drives  
489 incorporate multiple splits, with one drive element necessary to produce super-Mendelian in-  
490 heritance of the next element in the chain. The base of the chain is a non-drive element and  
491 the tip of the chain is the genetic payload containing the gene of interest to be inherited in the  
492 population. Each element in the chain increases in frequency temporarily and then decays as  
493 the preceding elements decline in frequency in the population through natural selection. Each  
494 element in the daisy chain is considered haplosufficient, so one copy produces the intended  
495 homing efficiency of the preceding element. Because daisy chain elements (loci) are intro-  
496 duced together in engineered individuals, spread of the payload gene occurs locally within a  
497 lineage in association with other loci and cannot be modeled using the same framework so far  
498 introduced which describes random pairing of alleles from one locus. The homing efficiency  
499 associated with the payload locus is primarily determined by this local lineage-based process  
500 of inheritance of daisy chain loci, especially when loci are at low frequency, and secondarily  
501 through outcrossing events with other lineages in the population that maintain daisy chain loci.  
502 The secondary process becomes consequential at high frequencies of daisy chain loci in the  
503 population. Homing efficiency of the payload corresponds is determined by the frequency of

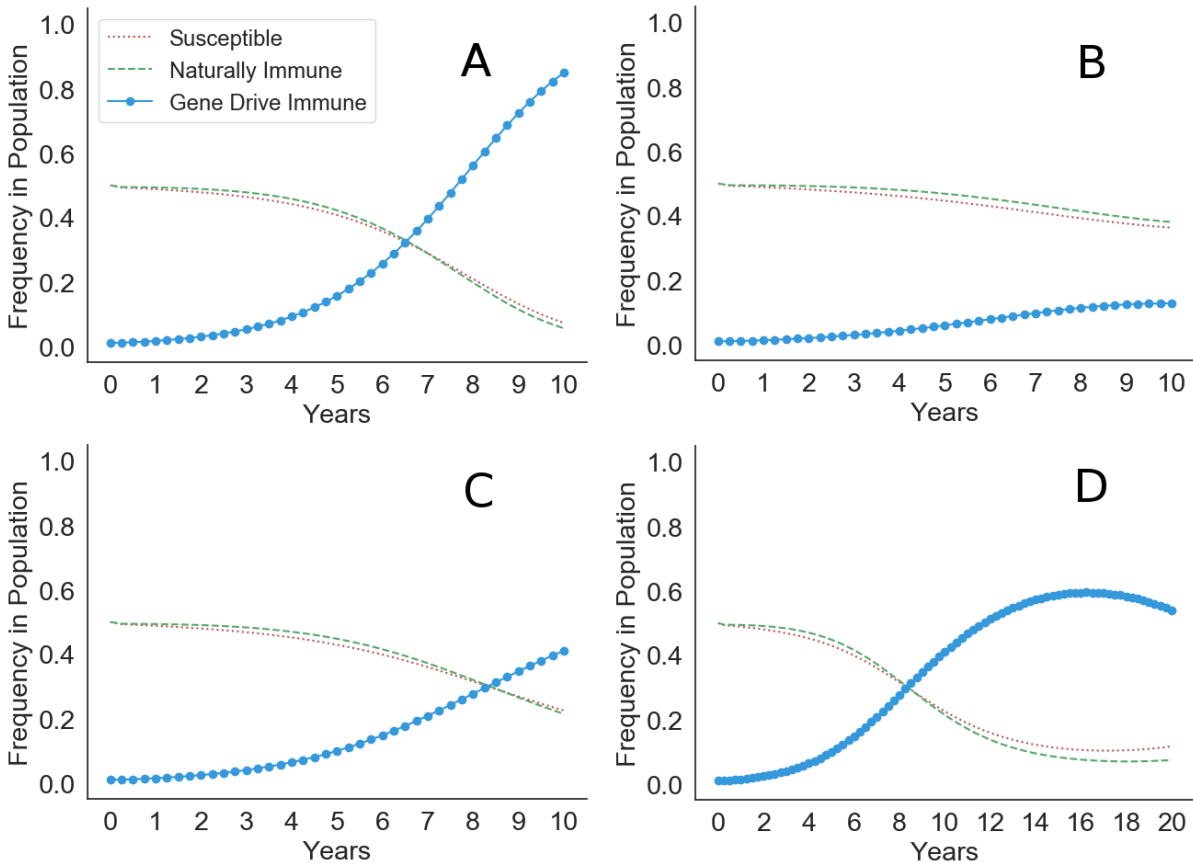

Figure 1: Forward simulations under fixed epidemiological conditions of the spread of GDMI with various resistance production rates per homing event. (A) No resistant alleles are produced. (B) Resistant alleles are produced with 20% of homing events. GDMI achieves only low frequency in the population due to rapid evolution of resistance to the drive mechanism. (C) Resistant alleles are produced with 10% of homing events. GDMI rises slowly, achieving half the frequency in the population compared to conditions where resistance does not evolve. (D) Resistant alleles are produced with 10% of homing events as in panel C. In 20 years it is evident that the frequency of resistant alleles outpaces the homing efficiency benefits in inheritance of GDMI, and GDMI declines after reaching intermediate frequency (eventually to negligible frequency).

504 the preceding locus in the daisy chain. We set  $\delta(t)$  as the daisy chain coefficient modulating  
 505 the homing efficiency. The daisy coefficient is directly proportional to the co-occurrence of  
 506 the payload and the preceding drive element and can be calculated as follows through time  
 507 for lineage-specific inheritance (i.e. each outcrossing event occurs with a snail with no drive  
 508 alleles):

$$\lim inf \delta(t) = \begin{cases} 1 & n = 0 \\ 2^{1-t} & n = 1 \\ \frac{2^{n-1} + 2^{n-2}(t-n)}{2^{t-1}} & n > 1 \end{cases} \quad (59)$$

509  $n$  is the number of splits in the drive design, which is equivalent to the number of drive  
 510 elements in the daisy chain (excluding the payload). This is the lower limit for the value of  $\delta(t)$ ,  
 511 as homing efficiency for the payload increases with the accumulation of the preceding drive  
 512 element in the population so that with each outcrossing event, the mate outside the primary  
 513 lineage may carry the preceding drive element. The frequency of the preceding drive element  
 514 in the population is always lower than the frequency of the payload, and is the frequency of the  
 515 payload in the prior generation before the peak frequency of the payload is reached. Fitness  
 516 costs of each drive element are assumed negligible compared to the cost of the genetic payload  
 517 at the tip of the daisy chain. After the peak frequency is reached, the frequency of the preceding  
 518 drive element is lower than the frequency of the payload in the prior generation. We can state  
 519 the following:

$$\lim sup \delta(t) = \begin{cases} 1 & n = 0 \\ 2^{1-t} & n = 1 \\ \frac{2^{n-1} + 2^{n-2}(t-n)}{2^{t-1}} + P_{payload}(t-1) & n > 1 \end{cases} \quad (60)$$

$$\delta(t) = \begin{cases} 1 & n = 0 \\ 2^{1-t} & n = 1 \\ \frac{2^{n-1} + 2^{n-2}(t-n)}{2^{t-1}} + P_{drive}(t) & n > 1 \end{cases} \quad (61)$$

520 where  $P_{payload}(t)$  and  $P_{drive}(t)$  are the frequencies of the genetic payload and the associated

521 preceding drive element in the daisy chain, respectively.  $\lim sup \delta(t) = \delta(t)$  prior to peak  
522 payload frequency. Equation S60 is useful to calculate the peak frequency of the payload in  
523 a daisy drive system without the need for a system of equations for each locus, which quickly  
524 becomes complex with additional elements in the chain. If we consider  $H_0$  as the maximum  
525 homing efficiency without a daisy chain design (1 locus,  $n = 0$ ), then the observed homing  
526 efficiency through time can be calculated as:

$$H(t) = \delta(t)H_0 \quad (62)$$

527 The homing efficiency at time  $t$  above represents the calculation for non-overlapping gener-  
528 ations where the population is fully replaced with offspring each generation. When generations  
529 overlap, this homing efficiency underestimates the observed homing efficiency because younger  
530 adults reproduce alongside older adults, which maintain higher loads of daisy chain loci from  
531 fewer outcrossing events. Older adults produce more GDMI offspring as a result. The observed  
532 homing efficiency at the population level at time  $t$  is a function of the survival of each age class.  
533 We calculate the surviving fraction of the payload allele as:

$$S_{B_g}(t) = \frac{\bar{N}_4(t) + \bar{N}_5(t) + 2\bar{N}_6(t)}{2} \quad (63)$$

534 Let  $\mathbf{S}_{B_g}$  be the vector of surviving fractions of the payload allele through time.

$$\mathbf{S}_{B_g} = [S_{B_g}(0), S_{B_g}(1), \dots, S_{B_g}(t)] \quad (64)$$

535 An age distribution,  $\bar{\mathbf{Z}}_{B_g}$ , can be produced by calculating the survival of each age class  
536 through time and normalizing the vector by the sum of the elements.

$$\mathbf{Z}_{B_g} = [S_{B_g}(0), \prod_{i=0}^1 S_{B_g}(i), \frac{\prod_{i=0}^2 S_{B_g}(i)}{\prod_{i=0}^1 S_{B_g}(i)}, \dots, \frac{\prod_{i=0}^t S_{B_g}(i)}{\prod_{i=0}^{t-1} S_{B_g}(i)}] \quad (65)$$

$$\bar{\mathbf{Z}}_{B_g} = \frac{\mathbf{Z}_{B_g}}{\sum_i Z_{B_g}(i)} \quad (66)$$

537 An adjusted daisy chain coefficient,  $\delta_{adj}(t)$ , can be produced by calculating the dot product  
538 of the vector of daisy chain coefficients and the age distribution:

$$\delta_{adj}(t) = \boldsymbol{\delta} \bar{\mathbf{Z}}_{B_g}^T \quad (67)$$

539 Homing efficiency at time  $t$  for a population with overlapping generations is therefore:

$$H(t) = \delta_{adj}(t) H_0 \quad (68)$$

540 This value for the homing efficiency in each generation can be substituted into the existing  
541 framework described to calculate the frequency of GDMI through time. Fig. S2 shows the  
542 trajectory of GDMI with the use of an increasing number of daisy chain loci.

### 543 **Model validation with empirical data**

544 Tennessen et al. 2015 [57] performed selection experiments using two infection conditions:  
545 10 and 30 miracidia per snail. These snails were 10 generations from natural *Biomphalaria*  
546 *glabrata* breeding populations and were kept together to breed during each generation of se-  
547 lection. After challenging each group of snails with miracidia, infected snails were removed  
548 from the breeding population. Selection for immunity was evident and genetically based as  
549 given by experimental evidence of decline in infection through the 6 generations of challenges.  
550 We modify our model to replicate these experimental conditions, first by assuming that removal  
551 from the breeding pool only occurs via infection (mortality = 0). We assumed a high probability

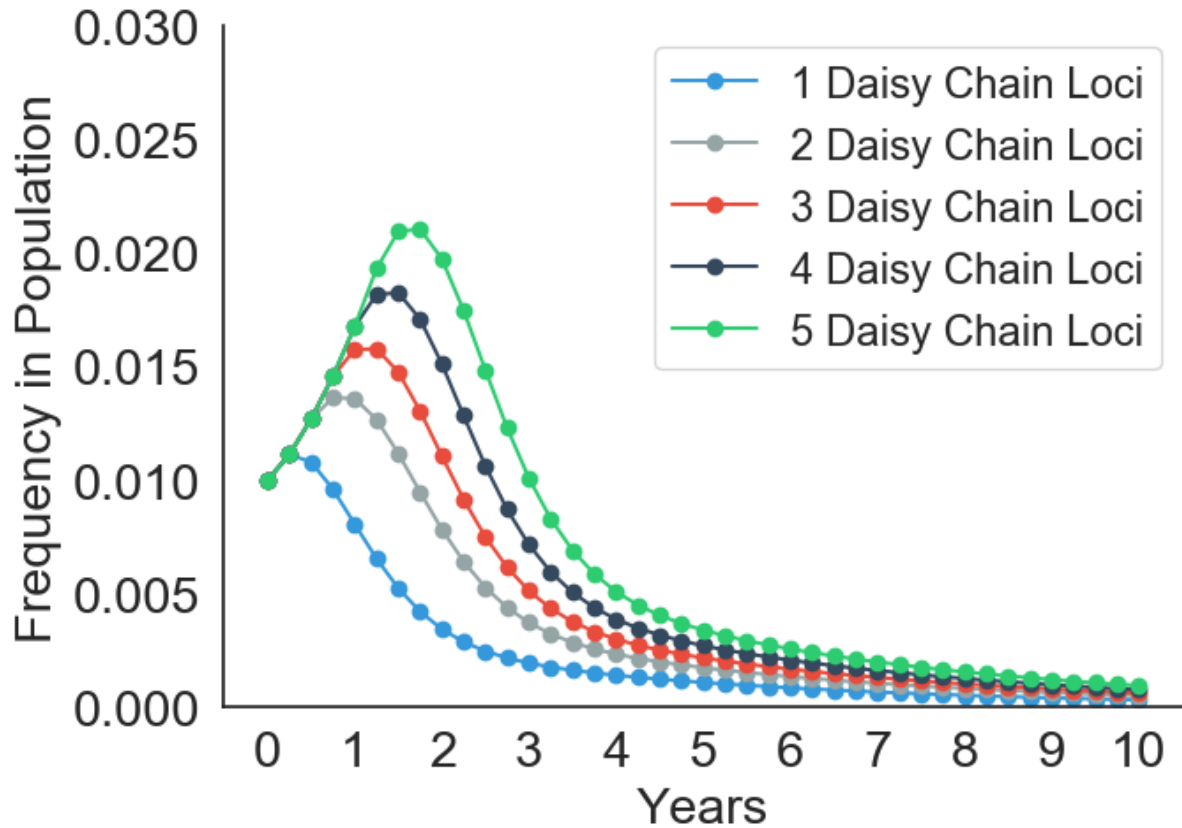

Figure 2: Forward simulations of daisy drive systems for the inheritance of GDMI designed with 1-5 daisy chain loci. Decay of the drive occurs after  $n$  generations, therefore more loci produce a longer lasting drive. However, because GDMI spreads slowly in the population compared to a fully outcrossed population, peak frequency of GDMI is low. Nearly 30 daisy chain loci are required to reach peak frequency of 50%, rendering daisy drive infeasible for implementation in this system.

552 of infection of 80% for susceptible snails in the 30 miracidia experimental condition. Because  
553 the snails are kept in close proximity, and *B. glabrata* are known to outcross frequently, we  
554 assume that outcrossing was the exclusive mode of reproduction (i.e. selfing = 0). Initial allele  
555 frequencies were calculated on the basis of the frequency of observed infections (approx. 57%)  
556 in the 30 miracidia experimental condition for a probability of infection of 80 % for susceptible  
557 snails. GDMI was absent and set to a frequency of 0. Otherwise, parameters were unaltered  
558 from simulation conditions in the main text. Initial allele and genotype frequencies were as-  
559 sumed the same between the two experimental treatments, and the probability of infection of  
560 susceptible snails was calculated given the frequency of observed infections in the first chal-  
561 lenge (48%). The probability of infection for the 10 miracidia treatment is 70%. The curves  
562 produced by the model in Fig. S3 of expected infection frequencies given these two calculated  
563 probabilities (70% and 80%) reflect the observed data well despite some assumptions (e.g. no  
564 self-fertilization) and experimental variability. We consider this fit qualitatively similar because  
565 some unknown experimental conditions are assumed, and therefore represent one of the possi-  
566 ble model outcomes. However, empirical evidence suggesting that immunity is a dominant trait  
567 and that it is regulated by a gene complex, which is tightly linked, corroborates our use of a one  
568 locus, complete dominance ( $h = 1$ ) model. Additionally, model parameters used in the sim-  
569 ulations of the main text are able to generate similar evolutionary dynamics to experimentally  
570 achieved evolution, and therefore, their values are further supported by our results in addition  
571 to support from literature.

## 572 **Dominance and penetrance of immune allele**

573 The above simulation in Fig. S3 demonstrates a strong qualitative fit to empirical data from  
574 selection experiments. The frequency of infection, which is the fraction of infected snails out of  
575 the total surviving exposed individuals, is a phenotype resulting from immunity to a miracidial



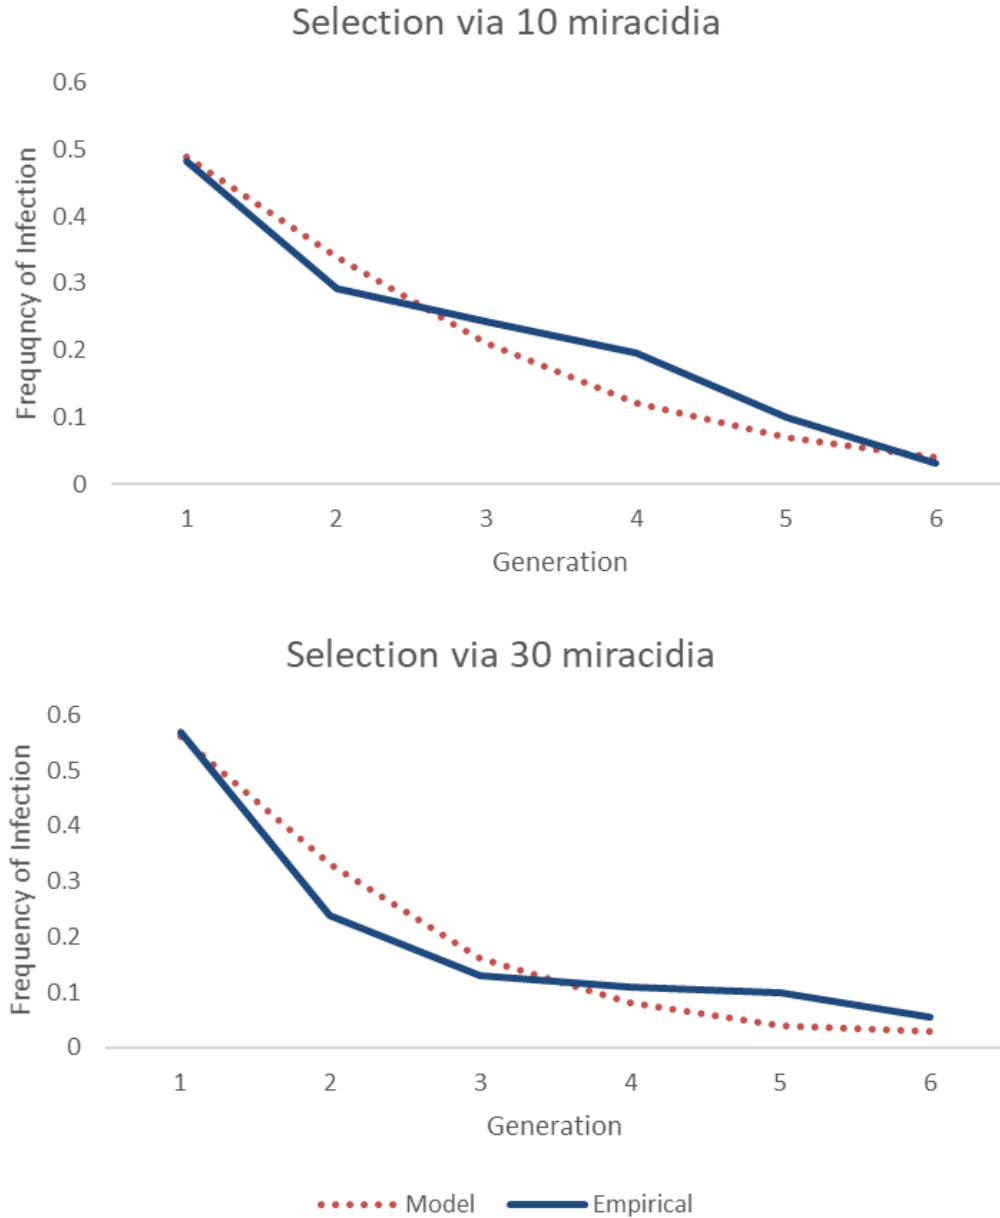

Figure 3: Qualitative comparison of model results to empirical data from published selection experiments by Tennessen et al. 2015. Two selection experiments were conducted, the first challenging each snail with 10 miracidia (top), and the second challenging each snail with 30 miracidia (bottom). Given initial conditions similar to experimental conditions, both models perform well in recapitulating selection for immunity to infection.

576 strain. The phenotype is a function of the exposure dose (number of miracidia) and the genetic  
577 underpinnings of immunity, including the number of loci involved, the dominance of immune  
578 alleles over susceptible alleles, and the penetrance of immune alleles. The genetic contributions  
579 to this phenotype could be myriad, but some large-effect loci have been identified in model snail  
580 species like *Biomphalaria glabrata*. These loci tend to be regions with high genetic variabil-  
581 ity and are linked to transmembrane proteins and receptors, which suggests a role in epitope  
582 recognition of an invading miracidium or sporocyst. One large-effect locus identified in Ten-  
583 nessen et al. 2015 served as a template for the default parameters used in the simulations in  
584 this work. We assumed a single locus model to represent this tightly linked gene cluster, and  
585 dominance of the immune allele over the susceptible allele was assumed complete as demon-  
586 strated in their empirical work. With a penetrance of 0.8, the model closely replicated observed  
587 evolution of immunity. However, as genetic work, such as genome wide association studies,  
588 identify new regions associated with immunity to schistosome infection in snails, more clarity  
589 will exist in the genetic contributions to immunity. Genes conferring immunity to one species  
590 or strain of schistosome may not confer immunity to others. These genes may not be conserved  
591 across snail species, and it is likely that immunity constitutes a wide array of variable genes. In  
592 *B. glabrata* two such polymorphic loci have been identified and described by Tennessen et al.  
593 2015 and Tennessen et al. 2020 [57, 62]. Named Polymorphic Transmembrane Cluster 1 and  
594 2 (PTC 1 and 2), these regions are each associated with several fold decreased odds of infec-  
595 tion. However, the immune allele within PTC 2 likely has higher penetrance than the immune  
596 allele within PTC 1, and although the immune allele in PTC 1 is haplosufficient and completely  
597 dominant, incomplete dominance is observed for the immune allele within PTC 2. Variation in  
598 the genetic mechanisms of immunity can result in altered evolutionary trajectories in the face  
599 of the same strength of selection due to infectious miracidia. We show below how variation  
600 in dominance and penetrance changes the expected frequency of infection after generations of

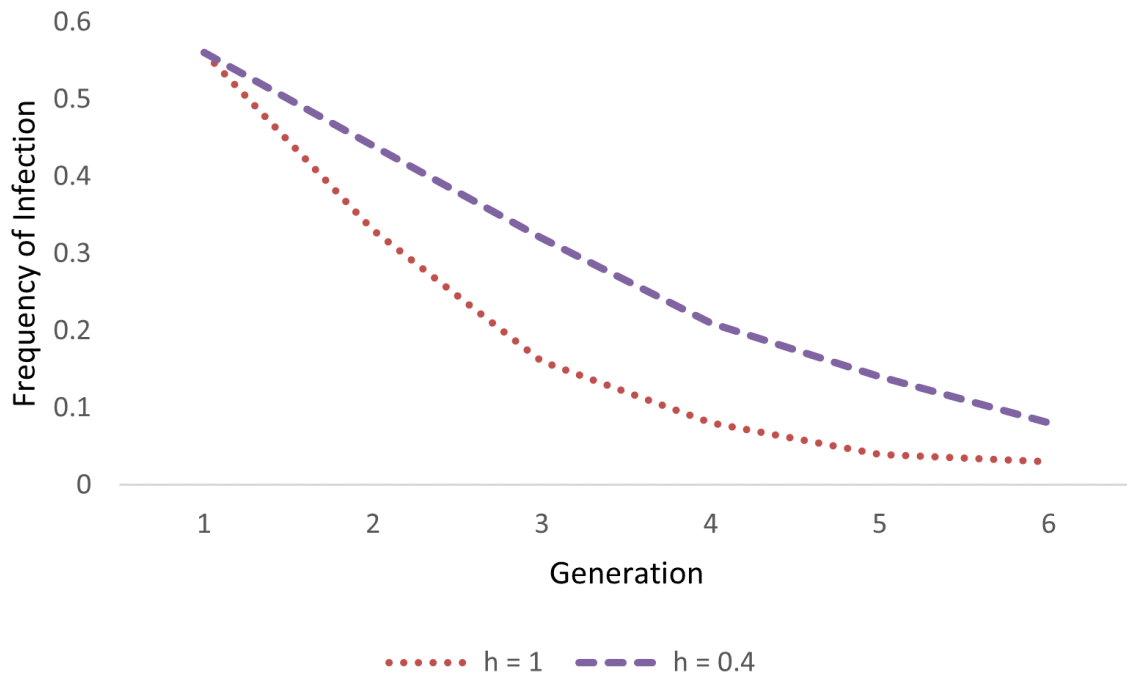

Figure 4: The relationship between the immune and susceptible alleles described by the dominance coefficient governs the trajectory of evolution for naturally-occurring immunity. Lower dominance of the immune allele leads to slower evolution of immunity, which could change the speed at which GDMI increases in frequency in a population.

601 selection observed in Fig. S4.

602 In contrast to naturally-occurring alleles that whose inheritance is governed by the interac-  
603 tion between selection and dominance, an effective gene drive (high homing efficiency) may  
604 not be sensitive to this interaction because gene drive heterozygotes are produced at low fre-  
605 quencies, and therefore, dominance plays only a small role in determining the fitness of gene  
606 drive alleles. We simulate GDMI inheritance under default conditions to test whether GDMI  
607 frequency is significantly altered by the strength of dominance of the immune allele over the  
608 susceptible allele(s). Dominance coefficients of 1 and 0.4 were chosen as the measured upper  
609 and lower bounds for PTC 1 ( $h = 1$ ) and PTC 2 ( $h = 0.4$ ). The results in Fig. S5 show that the  
610 effect of dominance on the success of gene drive in the 10 year evaluation window is minimal.

611 These results support the notion that an effective drive designed targeting either locus would  
612 operate similarly provided other factors are equivalent.

613 Two caveats may change these results: PTC 2 contains 2 susceptible alleles, therefore a nat-  
614 ural heterozygote of both susceptible allele exhibits intermediate immunity compared to natural  
615 homozygotes of each susceptible allele, and penetrance of immunity associated with PTC 2 was  
616 measured higher than PTC 1 (approx. 2-fold higher odds ratio). In the case of two susceptible  
617 alleles displaying a range of immunity across natural susceptible genotypes, independent assort-  
618 ment ensures that relative fitness of immune alleles will depend on the average absolute fitness  
619 of the susceptible alleles. The average absolute fitness of susceptible alleles is a byproduct of  
620 their interactions to produce a range of susceptible phenotypes. One susceptible allele in PTC 2  
621 is additive: the homozygote is twice as susceptible as the heterozygote (one susceptible allele,  
622 one immune allele). The other susceptible allele in PTC 2 is partially additive: the homozygote  
623 is less than twice as susceptible as the heterozygote. Barring other epistatic interactions, the  
624 measured susceptibility of the genotypes, their frequency, and the force of infection (directional  
625 selection) can be used to determine the relative fitness of immunity. However, differences be-  
626 tween the alleles, including costs of maintaining each of the susceptible genotypes, is unknown  
627 and precludes investigation into differences between the fitness of the susceptible genotypes  
628 in the face of selection. This subject will require further empirical investigation to determine  
629 whether a spectrum of susceptible alleles may alter the speed of establishment of GDMI for  
630 a PTC 2 -like target. Based on results presented in Fig. 3 (main text), GDMI establishment  
631 is mildly sensitive to standing genetic susceptibility to infection, thus we expect minor differ-  
632 ences in the evolutionary dynamics between a single susceptible allele system and a diversified  
633 susceptible allele system. A factor that has greater potential for impact on the evolutionary dy-  
634 namics of GDMI is penetrance. Higher penetrance of immunity results in greater phenotypic  
635 variation with a heritable basis, which provides greater evolutionary potential. Immunity asso-

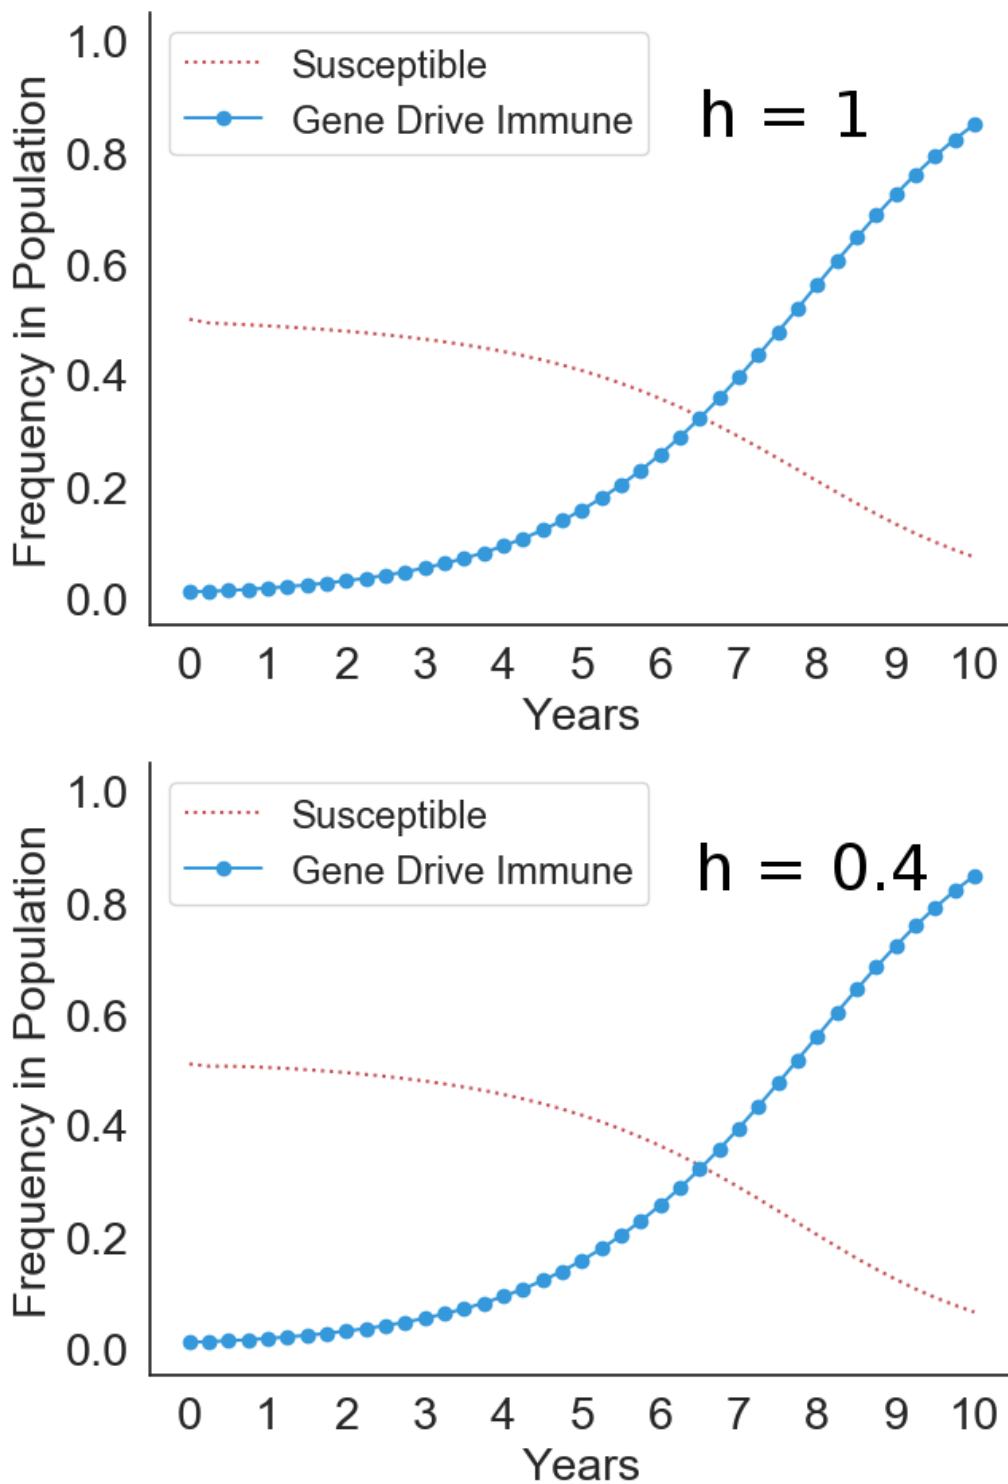

Figure 5: High dominance (top panel,  $h=1$ ) representing PTC 1 and low dominance (bottom panel,  $h=0.4$ ) representing PTC 2 do not yield measurably different results under default simulation conditions after 10 years.

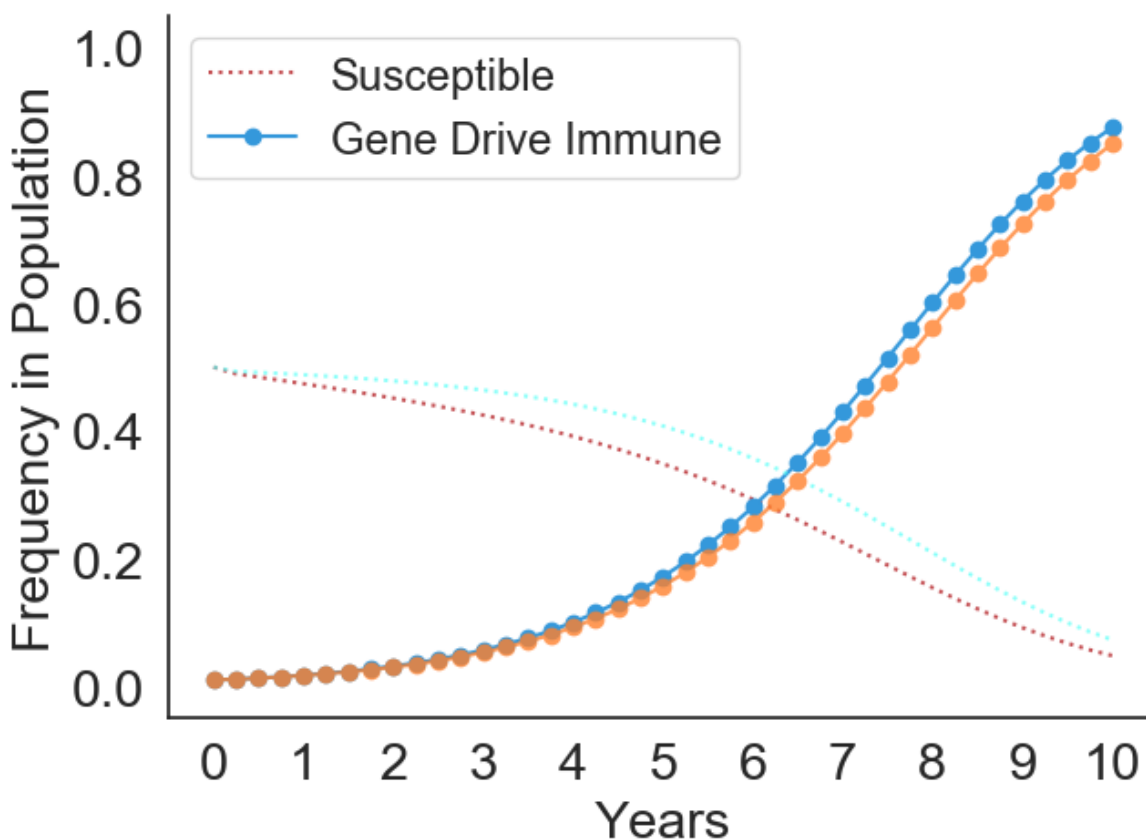

Figure 6: The effect of default penetrance ( $\iota = 0.8$ ) compared to higher penetrance ( $\iota = 0.9$ ) in the establishment of GDMI. Higher penetrance produces the blue GDMI and red susceptible lines, while lower penetrance produces the orange GDMI and light blue susceptible lines.

636 ciated with PTC 1 is modeled with  $\iota = 0.8$ . Susceptibility associated with PTC 2 represents up  
637 to 2-fold greater odds of infection. We simulate with  $\iota = 0.9$  in Fig. S6.

638 Despite the 2-fold greater odds of infection, PTC 2 susceptibility is not a significantly better  
639 target for GDMI. Resulting immunity in the population is similar after 10 years. These results  
640 change as the fitness advantages of GDMI over natural immunity diminish (e.g. low homing  
641 efficiency) and the fitness advantages of immunity over susceptibility strengthen (e.g. high force  
642 of infection).

## 643 **Generation time and population turnover**

644 The evolutionary dynamics for GDMI reported here describe conditions in which the average  
645 time to reproduction is 3 months and the natural background mortality is half of the adult pop-  
646 ulation in that time. However, when fortuitous environmental conditions prevail, or for snail  
647 species with shorter generation times, the establishment of GDMI in a population may happen  
648 at a different speed. In ten years, genotype frequencies in the population may be far different for  
649 these variable conditions. We demonstrate how variation of two basic life history parameters –  
650 natural mortality rate and generation time (mean time to reproduction) – influence the establish-  
651 ment of GDMI in 10 years. Fig. S7 displays simulations under default conditions, while these  
652 two life history parameters vary.

## 653 **Invasion conditions**

Each genotype can be determined to be invading given that it is increasing in frequency at time  $t = 0$ . Invasion of a genotype does not guarantee increasing frequency at any time  $t$ , as conditions may change, even in the deterministic model (i.e. model results are not monotonic). However, invasion criteria are important determinants in understanding the behavior of the genetic system in the early stages of gene drive release or even in a natural but unstable genetic system (e.g. strong directional selection). For GDMI establishment, the relative fitness of the gene drive homozygote must be greater than 1. This can be directly determined by ensuring:

$$\frac{\lambda_6(0)}{\lambda(0)} > P_{33}(0) \quad (69)$$

$$\implies \frac{\lambda_6(0)}{\lambda(0)P_{33}(0)} > 1 \quad (70)$$

654 Additionally, the total population size must not decline towards extinction for this invasion  
655 to be successful. In Fig. S8 we calculate invasion thresholds for the variety of model parameters  
656 in relation to self-fertilization frequency.

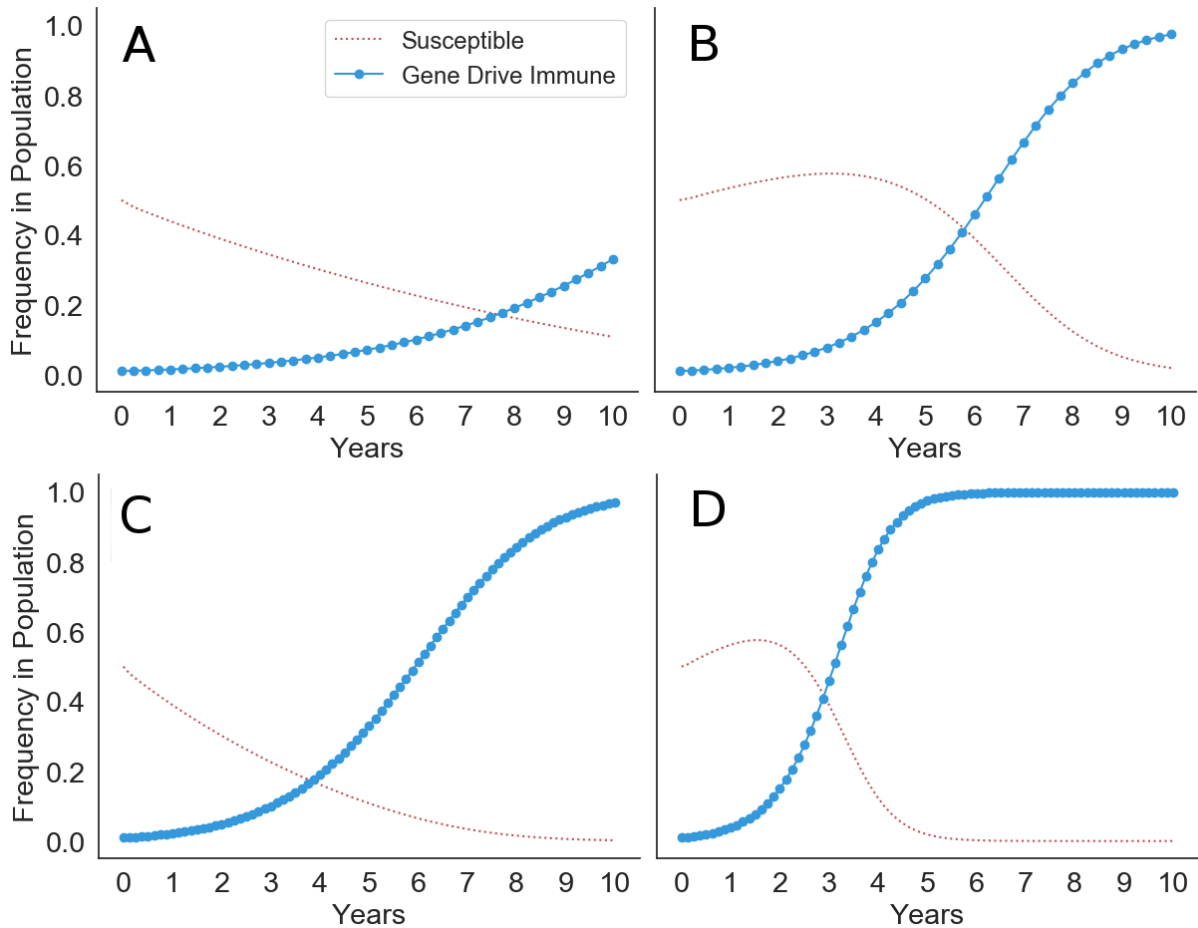

Figure 7: Simulations of susceptible and GDMI frequencies under variable life history strategies, namely mean generation time and death rate. Increasing death rate results in more population turnover each generation and more rapid fixation of GDMI. Panel A shows results for  $\mu = 0.25$  while panel B shows results for  $\mu = 0.75$ . Similarly, shorter generations yields more rapid fixation of GDMI in 10 years because more generations occur within the time window. Panels C and D give show results for a mean generation time of 1.5 months (80 generations in 10 years) in contrast to 3 months (40 generations in 10 years). Panel C maintains  $\mu = 0.25$ , and panel D maintains  $\mu = 0.75$ .



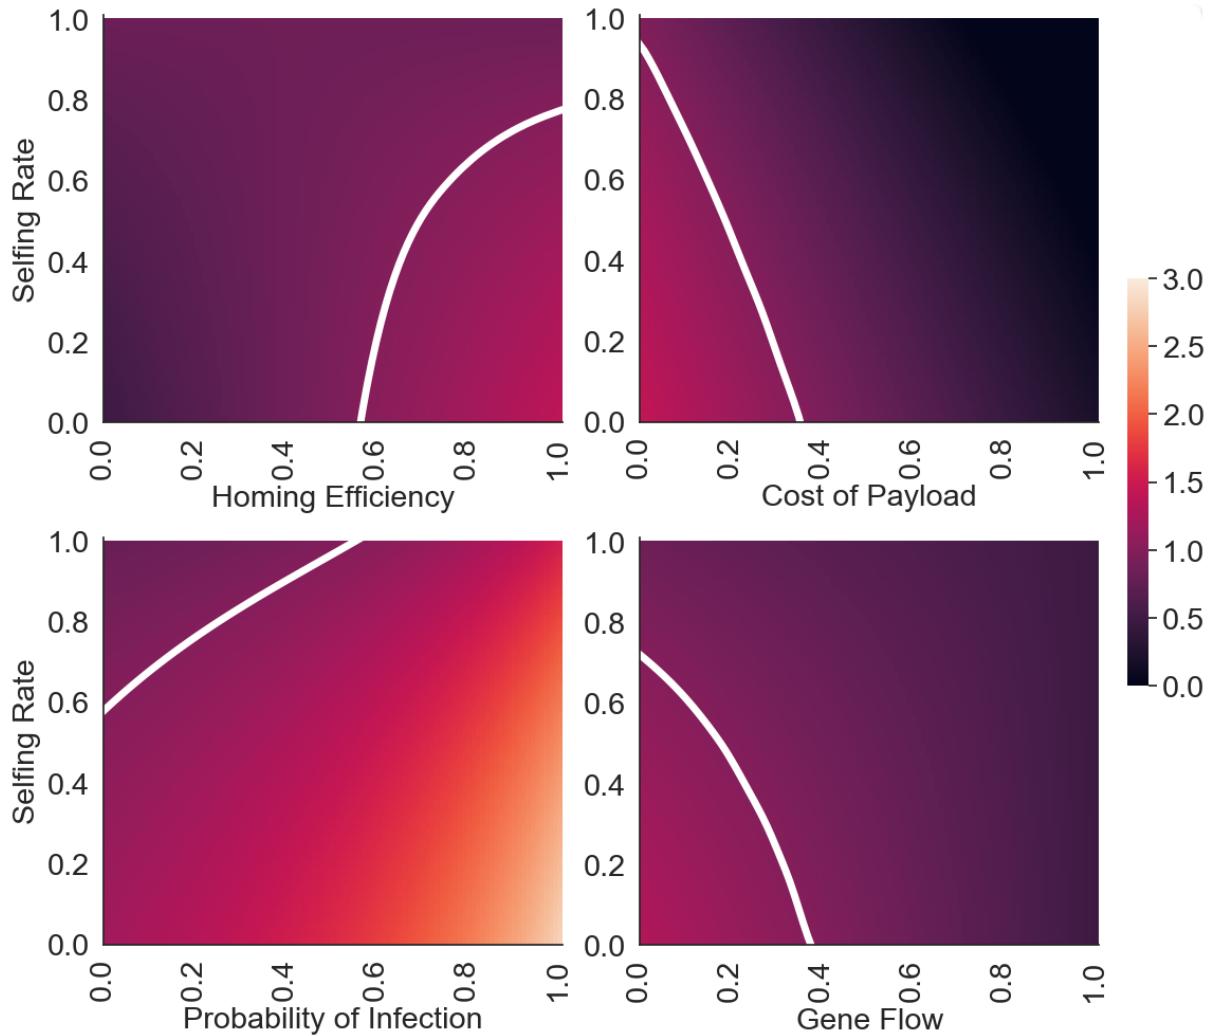

Figure 8: Invasion analyses for variables that influence the probability of invasion. Other parameters are held at their default value according to table S1, while the reproduction number is calculated as selfing rate varies. Lighter areas indicate higher reproduction numbers, and white lines represent the isocline at threshold conditions ( $R_0 = 1$ ). The ratio reported in equation S70 and  $R_0$  share a value of 1 under threshold conditions but are otherwise not precisely equal due to the nature of overlapping generations in the model.

657        Selfing rate and homing efficiency interact to form a curved region bounding values above  
658  $H = 0.6$  and below  $\sigma = 0.8$ . Homing efficiencies below 0.6 do not produce a viable gene  
659 drive under default conditions for any selfing rate. Similarly, selfing rates above 0.8 render a  
660 gene drive less fit than the natural population and unable to invade. Also supported by Fig. 3  
661 in the main text, the cost of the payload is a strong determinant in the success of the invasion  
662 of GDMI. Perhaps strongest is the influence of gene flow on the invasion of GDMI, which  
663 restricts invasion to a small subset of conditions, rapidly excluding snail species with moderate  
664 selfing rates as gene flow increases. This does not capture long-term dynamics where GDMI  
665 individuals immigrate to the focus population – a process that may occur if GDMI establishes in  
666 the neighborhood of the focus population. Highlighted here is the robustness of invasion across  
667 the range of disease conditions. In both low and high transmission areas, invasion of GDMI is  
668 possible for some or all snail species. Species exhibiting high selfing rates may be invaded by  
669 GDMI in high transmission areas.

## 670 **Extinction risk**

671 Invasion thresholds are valid and provide context for the conditions in which GDMI will pro-  
672 liferate given that the GDMI allele is not lost from the population due to genetic drift. Drift is  
673 strongest in generations immediately proceeding introduction (in a homogeneous environment)  
674 when the size of the pool of GDMI alleles is small. In contrast to a deterministic invasion  
675 process, genetic drift depends on the size of the seed GDMI population. We show how the  
676 probability of extinction of GDMI in 10 years (40 generations) varies with the size of the seed  
677 population and the absolute fitness of GDMI. We assume the probability of extinction is driven  
678 by a stochastic death process contributed through background mortality and infection prior to  
679 reproduction in each generation. Default parameters for background mortality and infection  
680 for GDMI homozygotes are  $0.5 \text{ gen}^{-1}$  and  $0.03 \text{ gen}^{-1}$ , respectively. Therefore, we model the

681 stochastic death process as  $Pr(X = k \text{ deaths}) = B(n, 0.53)$ , where  $n$  is the number of GDMI  
682 homozygotes (excludes heterozygotes for simplicity due to their transiency at  $H = 0.9$ ). Given  
683 a geometric mean absolute fitness  $f$  and number of generations from introduction,  $t$ , the cumu-  
684 lative distribution function representing the probability of extinction at time  $t$  is

$$Pr(X \leq (t + 1)) = Pr(X \leq t) + 0.53^{n f^{t+1}} (1 - 0.53^{n f^t}) (1 - Pr(X \leq t)) \quad (71)$$

685 We calculate the probability of extinction within 40 generations ( $t = 40$ ) using this recursive  
686 formulation and plot the results in Fig. S9 across a range of absolute fitness values and number  
687 of seeded GDMI individuals in the focal population.

688 Results indicate that the probability of extinction depends primarily on the absolute fitness of  
689 GDMI and little on the number of seeded individuals. Extinction is guaranteed below geometric  
690 mean absolute fitness of 0.9, regardless of the size of the introduced GDMI cohort. At low  
691 numbers, the threshold of extinction resides at a fitness of 1. This threshold is stark, with  
692 very little intermediate extinction risk in 40 generations. This is due primarily to the number of  
693 generations simulated; fewer generations would yield more intermediate extinction probabilities  
694 on the same plot. Combined with earlier results, this shows that the size of the introduced cohort  
695 is important for rapid fixation of GDMI but less important for persistence of GDMI in the  
696 population. This conclusion may not hold when reproduction and death is highly variable due  
697 to factors like seasonality. Higher variability will result in higher extinction risk, particularly  
698 for smaller seed populations.

## 699 **Seasonality**

700 Dramatic variation in available snail habitat due to seasonal changes in precipitation is common  
701 in schistosomiasis endemic regions. Highest variation is observed in sites with ephemeral water  
702 bodies and agricultural areas. It is unclear how seasonal variation in habitat availability will

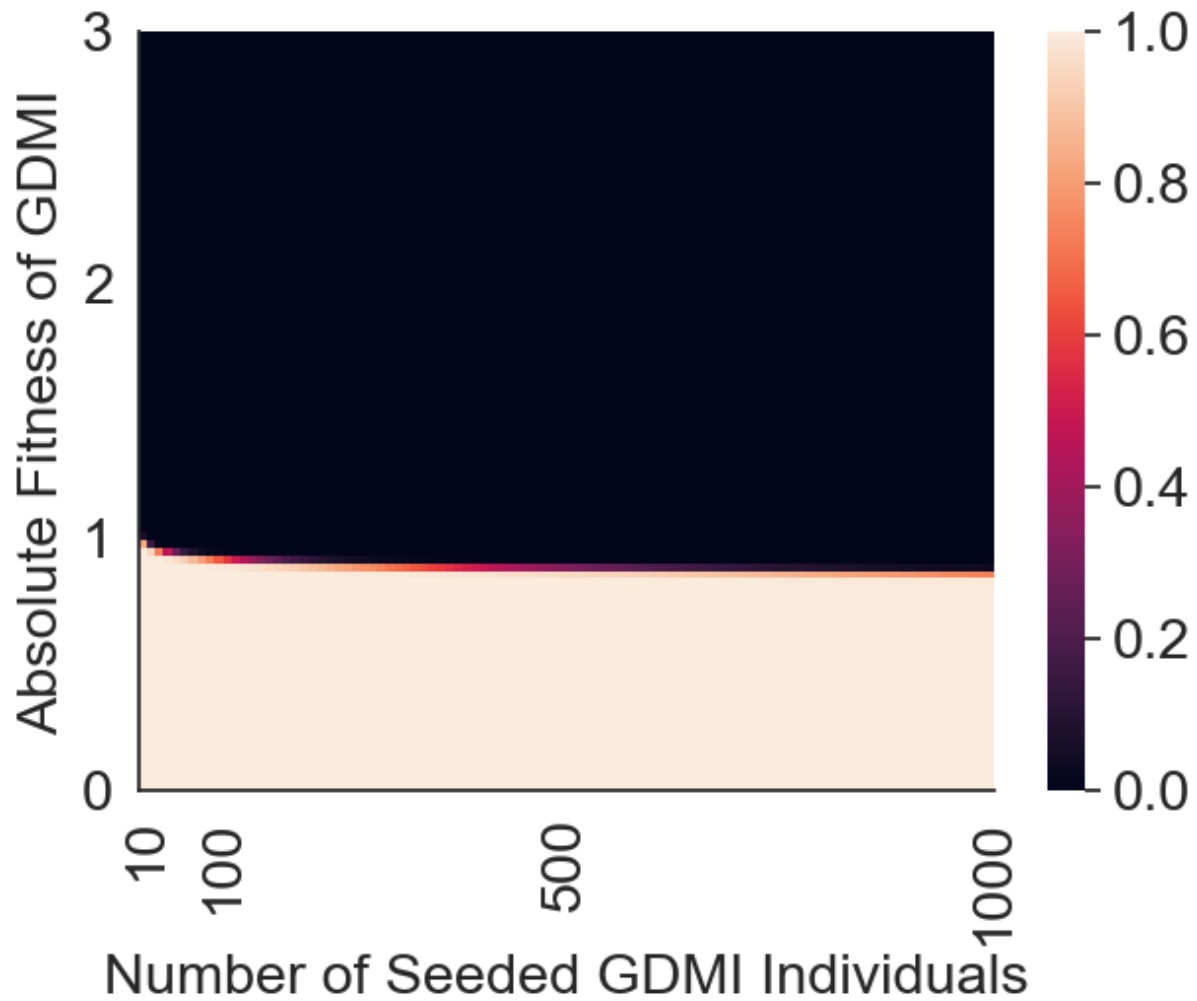

Figure 9: The probability of extinction within 40 generations according to absolute fitness and the number of seeded GDMI individuals. Darker values represent low likelihood of extinction.

703 alter the speed of establishment of GDMI. We compare GDMI establishment with and without  
704 seasonality in carrying capacity of the snail population, with a four fold change in carrying  
705 capacity simulated in the seasonally variable population. Fig. S10 demonstrates that seasonality  
706 slows the establishment of GDMI, even in a deterministic model. Although not shown in Fig.  
707 S10, higher variability in carrying capacity corresponds monotonically to slower establishment  
708 of GDMI. These results support the use of GDMI in sites with less seasonal variability in snail  
709 population abundance.

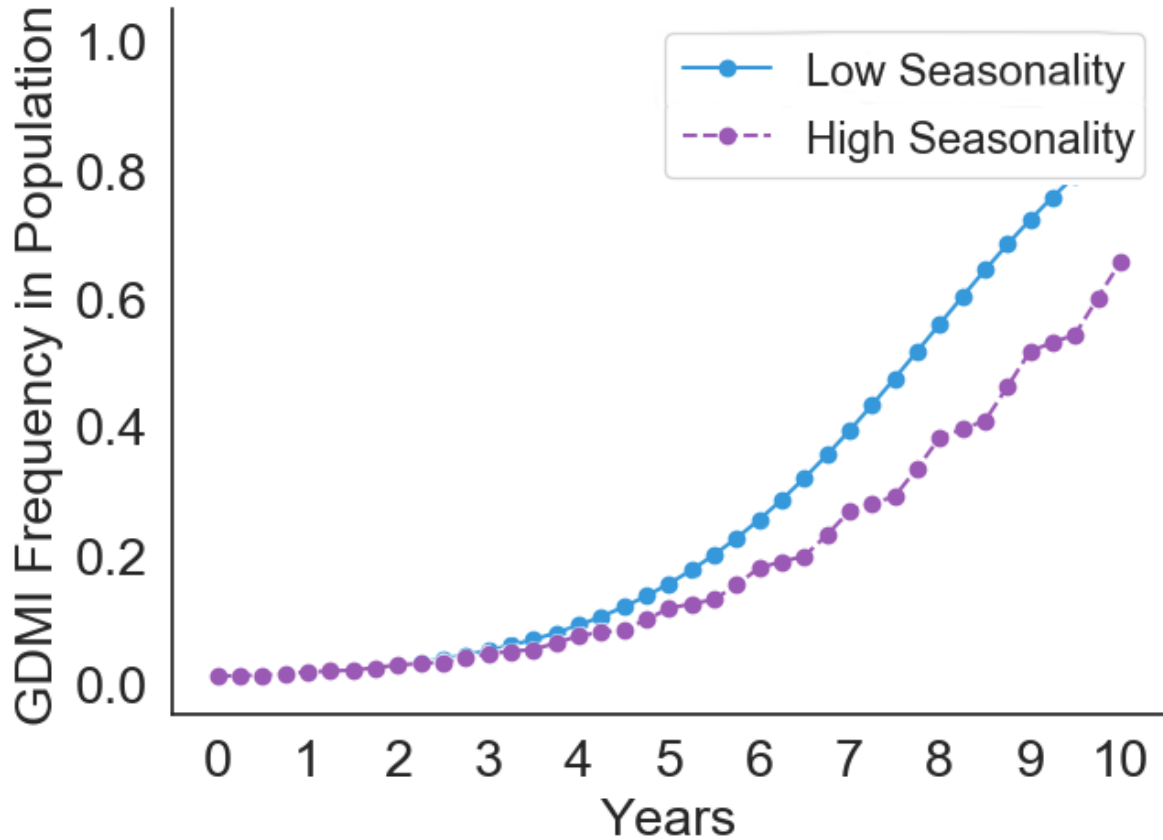

Figure 10: The spread of GDMI in a population with fluctuating carrying capacity due to seasonal rainfall and habitat variation. High seasonality assumes at 4 fold change in carrying capacity in 2 generations, with a full cycle occurring in 4 generations (equal to 1 year with default generation time): 200 %, 100 %, 50 %, 100% carrying capacity cycle. Low seasonality assumes no fluctuation in carrying capacity.

## 710 Epidemiological model

711 Here we modify the classic MacDonald model for schistosome transmission to include the  
712 frequency of resistant snails that occurs in the environment due to introduction and subsequent  
713 spread of GDMI in the population. The simplest form this takes is to subtract the frequency of  
714 immune snails from the susceptible snail frequency such that the frequency of susceptible snails  
715 is given by  $(1 - y - \rho)$ , where  $\rho$  is the frequency of immunity (natural and engineered). The  
716 resulting system of coupled ordinary differential equations is given below (equations 5 and 6 in  
717 the main text):

$$\frac{dw}{dt} = \alpha y - \mu w \quad (72)$$

$$\frac{dy}{dt} = \Lambda^*(1 - e^{-\beta w})(1 - y - \rho) - \nu y \quad (73)$$

718 These two equations govern the prevalence of infection in snails,  $y$ , and the mean per capita  
719 worm burden in humans,  $w$ . The distribution of adult worms in the human population is as-  
720 sumed to approximate a negative binomial distribution. Parameters and their values are de-  
721 scribed in table S2.

722 We evaluate the efficacy of GDMI intervention by comparing mean worm burden after a  
723 ten year period with the mean worm burden at equilibrium endemic conditions. We calculate  
724 transmission rates  $\Lambda$  and  $\alpha$  at endemic equilibrium. Let  $w^*$ ,  $y^*$  be nontrivial equilibria for which  
725  $\frac{dw}{dt} = \frac{dy}{dt} = 0$ .

$$w^* = \frac{\alpha y}{\mu} \quad (74)$$

$$y^* = \frac{(1 - \rho)\Lambda(1 - e^{-\beta w})}{\Lambda(1 - e^{-\beta w}) + \nu} \quad (75)$$

Table 2: Parameter values for the epidemiological model

| Parameter   | Description                                                            | Value                                        | Ref.                                                                                                                     |
|-------------|------------------------------------------------------------------------|----------------------------------------------|--------------------------------------------------------------------------------------------------------------------------|
| $\alpha$    | transmission rate converting snail infections to adult worms in humans | $142 \text{ wk}^{-1}$                        | calculated based on model equilibrium at $w^* = 710$ , $y^* = 0.02$                                                      |
| $\mu$       | death rate of adult worms                                              | $0.004 \text{ wk}^{-1}$                      | Harmonic mean of range of $(3 - 7 \text{ yrs})^{-1}$ commonly reported in literature across <i>Schistosoma spp.</i> [63] |
| $\Lambda^*$ | force of infection from humans to snails at endemic equilibrium        | $0.0104 \text{ wk}^{-1}$                     | derived from epidemiological model                                                                                       |
| $\rho$      | fraction of immune snails                                              | variable, $\rho^* = 0.5$                     | determined by genetic model                                                                                              |
| $v$         | death rate of infected snails                                          | $0.25 \text{ wk}^{-1}$                       | Harmonic mean of death rates of infected <i>Bulinus globosus</i> and <i>Biomphalaria pfeifferi</i> [55]                  |
| $b$         | per capita worm to snail transmission rate                             | $3 * 10^{-5} w^{-1}$                         | calculated based on model equilibrium at $w^* = 710$ , $y^* = 0.02$                                                      |
| $\beta$     | human population to snail transmission rate                            | variable, $\beta^* = 0.0147 \text{ wk}^{-1}$ | calculated: $\beta = \frac{1}{2}\phi b$                                                                                  |
| $m$         | per capita mean number of mated pairs of adult worms                   | variable, $m^* = 348$                        | calculated: $m = \frac{1}{2}\phi w$                                                                                      |
| $k$         | clumping parameter: $NB(w, k)$                                         | 0.24                                         | fitted to <i>S. mansoni</i> data [64]                                                                                    |
| $w$         | per capita mean worm burden                                            | variable, $w^* = 710$                        | calculated based on model equilibrium at $\Omega = 0.80$                                                                 |
| $y$         | frequency of patent infections in snail population                     | variable, $y^* = 0.02$                       | field-observed average in endemic regions [65]                                                                           |
| $\phi$      | per adult worm mating probability                                      | variable, $\phi^* = 0.98$                    | calculation based on $NB(w, k)$                                                                                          |
| $\Omega$    | per capita prevalence of at least one mated pair of adult worms        | variable, $\Omega^* = 0.80$                  | field-observed average in endemic and hyperendemic regions [66, 67]                                                      |



726  $y^*$  is frequently estimated in field surveys and may vary across sites or through the year  
727 due to seasonal variability in rainfall and human use of aquatic snail habitat like drainage areas,  
728 irrigation ditches, or natural water bodies. Despite variation, low infection prevalence (0-5%) in  
729 snails is observed, even in hyperendemic areas. Explanations for low prevalence are multifactorial  
730 and relate to the duration of patency, increased mortality rate of patent snails, heterogeneous  
731 exposure to miracidial infection, partially evolved immunity to infection, and competition with  
732 other trematodes.  $w^*$  is not as easily estimated, as measurements rely on quantification of shed  
733 eggs in urine and fecal samples. The quantity of eggs is correlated but not linearly related to  
734 the number of paired worms, as human immunity leading to granulomatous formation around  
735 released eggs as well as potential interactions among adult worms and variability in egg production  
736 can obscure the relationship between eggs shed and worm burden. Human autopsies  
737 performed on known and suspected schistosomiasis cases reveal differential distribution of eggs  
738 and associated pathology with increasing intensity of infestation. Cheever (1968) observed that  
739 fewer eggs were present in the rectal mucosa and feces of *S. mansoni* infected individuals with  
740 associated fibrosis of the liver. This demonstrates that pathology, intensity, and egg count are  
741 not directly related, and the nature of their relationship requires biological knowledge of both  
742 the distribution of worms across tissue and the interactions between worms and the immune  
743 system. Despite these limitations, a reasonable heuristic is a 1:1 ratio of adult worm mated  
744 pairs and eggs per gram (EPG) in feces (*S. mansoni*). Multiple lines of evidence, including  
745 challenge experiments in mice, organ specific autopsies and perfusions, as well as observed  
746 distributions of EPG in human populations suggests that per capita mean worm burden (MWB)  
747 in highly endemic areas can exceed 1000. We simulate moderate-high endemicity with an infection  
748 prevalence of  $\Omega^* = 0.80$ . When the prevalence of infection is  $\ll 1$ , a proportion of  
749 adult worms fail to pair with a mate and reproduce. The number of mated pairs can be calculated  
750 given the MWB and the distribution of adult worms in the human population. A negative

751 binomial distribution is found to best represent the distribution of adult worms in humans. It is  
752 overdispersed, and dispersion increases as prevalence decreases. Prevalence of detectable eggs,  
753 and therefore successfully mated pairs is given as

$$\Omega(w, k) = 1 - 2\left(1 + \frac{w}{2k}\right)^{-k} + \left(1 + \frac{w}{k}\right)^{-k} \quad (76)$$

754 and  $w$  is calculated via substitution of the known prevalence of infection,  $\Omega$ , and aggrega-  
755 tion parameter,  $k$ , and solving numerically. An equal ratio of male and female schistosomes is  
756 assumed in this calculation, as is that the rates of transmission between the two sexes are equiv-  
757 alent [68]. We also assume that both sexes transmit together, and there is no sex-specific com-  
758 partmentalization in the human body that would limit pairing of adult schistosomes.  $w^* = 710$   
759 occurs at an endemic equilibrium prevalence,  $\Omega$ , of 80%. Given  $w^* = 710$  and  $y = 0.02$ ,  $\alpha$  can  
760 be calculated as

$$\alpha = \frac{w^* \mu}{y^*} = 142 \quad (77)$$

761 In contrast the  $\alpha$ , which holds a constant value,  $\beta$  is a function of the distribution of worms  
762 in the local human population. The distribution changes non-linearly with worm burden and  
763 prevalence. For simplicity, we assume that  $k$  is invariant as worm burden and prevalence change,  
764 although evidence suggests higher aggregation with higher burden in some populations.  $\beta$  takes  
765 the form:

$$\beta = \frac{1}{2} b \phi \quad (78)$$

766 in which  $b$  is a transmission constant that relates the per capita number of mated worm pairs,  
767  $m$ , to new infections in snails.

$$m = \frac{1}{2}\phi w \quad (79)$$

768  $\phi$  is the mating probability given by the negative binomial distribution where  $\delta = \frac{w}{w+k}$ .

$$\phi = 1 - \frac{(1 - \delta)^{1+k}}{2\pi} \int_0^{2\pi} \frac{(1 - \cos\theta)d\theta}{(1 + \delta\cos\theta)^{1+k}} \quad (80)$$

769 Given  $w^*$  and  $y^*$ ,  $\Lambda^*$  can be calculated by approximating that  $(1 - e^{-\beta w}) \approx 1$  at endemic  
770 equilibrium conditions. Equation S73 simplifies to:

$$\frac{dy}{dt} = \Lambda^*(1 - y - \rho) - vy \quad (81)$$

771 Solving for the nontrivial equilibrium yields:

$$\Lambda^* = \frac{vy^*}{1 - y^* - \rho^*} = 0.0104 \quad (82)$$

772 The probability of infection per generation,  $Pr(y^+)$ , can be approximated from the force of  
773 infection and the differential equation for snail infection prevalence:

$$Pr(y^+) \approx \int_{t=\tau}^{\tau+1} \Lambda^*(1 - e^{-\beta w})dt \quad (83)$$

774 This expression represents the per capita number of snail infections expected in a susceptible  
775 population in a generation ( $t = \tau$  weeks).

776 We do not yet have an estimate for  $\beta$  (variable) and therefore no estimate for  $b$  (constant).  
777 These values we determine by calibrating the model with known values for  $R_0$  in moderate-high  
778 transmission sites. The magnitude of  $R_0$  has never been precisely measured for schistosomia-  
779 sis, as doing so would require measurements of innate immunity in the snail population. It is  
780 unknown whether genetic immunity provides cross protection for other trematode species, and

781 therefore, even in a previously schistosome-naïve area, pre-existing immunity requires measure-  
 782 ment through challenge experiments. With this caveat in mind,  $R_0$  measurements are widely  
 783 thought to exist in the range of 2-5 for schistosomiasis, likely exceeding 3 in moderate-high  
 784 transmission sites [69]. In a fully susceptible snail population, these values will be higher, and  
 785 in all likelihood empirically measured  $R_0$  values underestimate true  $R_0$  values predicated on a  
 786 fully susceptible host population. From our system of differential equations we calculate the ef-  
 787 fective reproductive number  $R_t$  and from it, derive the  $R_0$  under conditions of partial immunity  
 788 in snails to calibrate  $\beta$ . Linearizing the system of equations with respect to  $w$  and  $y$ , we form the  
 789 transmission and transition matrices outlined by Diekmann et al. in their next generation matrix  
 790 (NGM) approach to calculate  $R_0$  [70]. We extend this approach by relaxing the assumption that  
 791 the populations of snails and humans are fully susceptible and that no disease is present before  
 792 an index case. Doing so, we calculate transmission and transition matrices for  $R_t$  as:

$$\mathbf{T}_t = \begin{pmatrix} 0 & \alpha \\ (1 - \rho)\beta\Lambda^*e^{-\beta w} & 0 \end{pmatrix} \quad (84)$$

$$\mathbf{\Sigma}_t = \begin{pmatrix} -\mu & 0 \\ -y\beta\Lambda^*e^{-\beta w} & -(v + \Lambda^*(1 + e^{-\beta w})) \end{pmatrix} \quad (85)$$

793 We calculate the time-varying NGM as:

$$\mathbf{K}_t = -\mathbf{T}_t\mathbf{\Sigma}_t^{-1} = \begin{pmatrix} \frac{-\alpha\beta y\Lambda^*e^{-\beta w}}{\mu(\Lambda^*(1+e^{-\beta w})+v)} & \frac{\alpha}{\Lambda^*(1+e^{-\beta w})+v} \\ \frac{(1-\rho)\beta\Lambda^*e^{-\beta w}}{\mu} & 0 \end{pmatrix} \quad (86)$$

794 The expression for  $R_t$ , computed as the spectral radius of  $\mathbf{K}_t$ , is

$$R_t = \frac{\sqrt{\alpha\beta\Lambda^*(\alpha\beta\Lambda^*y^2 + 4\mu(1-\rho)(\Lambda^* + (\Lambda^* + v)e^{\beta w}))} - \alpha\beta\Lambda^*y}{2\mu(\Lambda^* + (\Lambda^* + v)e^{\beta w})} \quad (87)$$

795 A derivation of  $R_0$  would require setting  $\rho = w = y = 0$ . However, because empirical  
796 measurements of  $R_0$  have not accounted for variations in  $\rho$ , we calibrate  $\beta$  from an empirical  
797 form of this equation. Specifically, we set  $\rho = 0.5$  according to default conditions that are based  
798 on empirical measurements of innate immunity in field captured snails. Setting  $w = y = 0$   
799 yields the following expression for an empirical  $R_0$

$$R_0 = \sqrt{\frac{\alpha\beta\Lambda^*(1-\rho)}{\mu(2\Lambda^*+v)}} \quad (88)$$

800 and when  $\rho = 0.5$ , the expression becomes:

$$R_0 = \sqrt{\frac{\alpha\beta\Lambda^*}{2\mu(2\Lambda^*+v)}} \quad (89)$$

801 Solving for  $\beta$  yields

$$\beta = \frac{2\mu R_0^2(2\Lambda^*+v)}{\alpha\Lambda^*} \quad (90)$$

802 Recall that  $\beta$  is a function of the negative binomial distribution of worms, which deter-  
803 mines the probability of mating success among adult worms. However, this theoretical con-  
804 struct breaks down for the low numbers assumed in an index case. For at low numbers,  $\phi$  would  
805 approximate zero for a stationary  $k = 0.24$ , and extinction is predicted. The concept of  $R_0$   
806 would be irrelevant for schistosomiasis if these theoretical predictions were valid. Instead we  
807 assume that early transmission of cercariae are highly clustered and that  $\phi$  remains high for the  
808 purposes of estimating the constant  $b$  which scales  $\beta$ . Setting  $\phi = 1$ , we achieve

$$b = \frac{4\mu R_0^2(2\Lambda^*+v)}{\alpha\Lambda^*} \quad (91)$$

809 We set  $b$  to a value with one significant digit so that  $R_0$  is approximately the median of  
810 empirically measured values. This gives  $b = 0.03$  and  $R_0 = 3.2$ . In practical terms,  $b$  represents

811 the ‘rebound speed’, which is the pace infections can accrue after chemotherapy treatment. Un-  
812 der certain conditions, our estimate may represent the low end of this rebound speed due to  
813 the assumption of 100% mating success in index case infections. Moreover, our estimate of  
814  $R_0 = 3.2$  is calibrated based on prior empirical measurements, which almost certainly under-  
815 estimate the true  $R_0$  as specified by a fully susceptible host population. We do not explicitly  
816 account for adaptive immunity in humans, which has been shown to increase over 10+ years  
817 into adulthood. Accounting for evolved innate immunity in snails by setting  $\rho = 0$ , we find that  
818  $R_0 = 4.5$ .

819 In Fig. S11 we show the long-term behavior of the default model without introduction of  
820 GDMI. A reproduction number of 3.2 produces a rapid rise of an epidemic past the endemic  
821 equilibrium, and as the snail population evolves immunity, an equilibrium is established. Feed-  
822 back from schistosome transmission produces stabilizing selection on immunity in snails.

823 In Fig. 4 of the main text, GDMI was evaluated in comparison to and with coincident annual  
824 MDA treatment. 60% reduction in MWB in the population was modeled for each treatment and  
825 is a product of coverage and efficacy of the chemotherapy. Although alone GDMI is not ca-  
826 pable of eliminating schistomiasis locally within a 10 year evaluation period, it was shown to  
827 successfully complement MDA under simulated conditions to produce greater and more sus-  
828 tained reduction than MDA alone. However, these results may be sensitive to several factors,  
829 especially the force of infection to humans which determines how rapidly the human popula-  
830 tion becomes infected from an infected snail population. Rapid reinfection results in a faster  
831 rebound to pre-treatment MWB, and therefore, subsequent treatment is less effective because  
832 MWB reduction is not long lasting. We explore high and low transmission conditions by ma-  
833 nipulating  $b$ , which in turn, changes  $\beta$ . Fig. S12 shows the difference between  $R_0 = 2.3$  and  
834  $R_0 = 4.5$  conditions as MDA and GDMI are applied.

835 GDMI performs favorably in absolute reduction in joint use with MDA when transmission

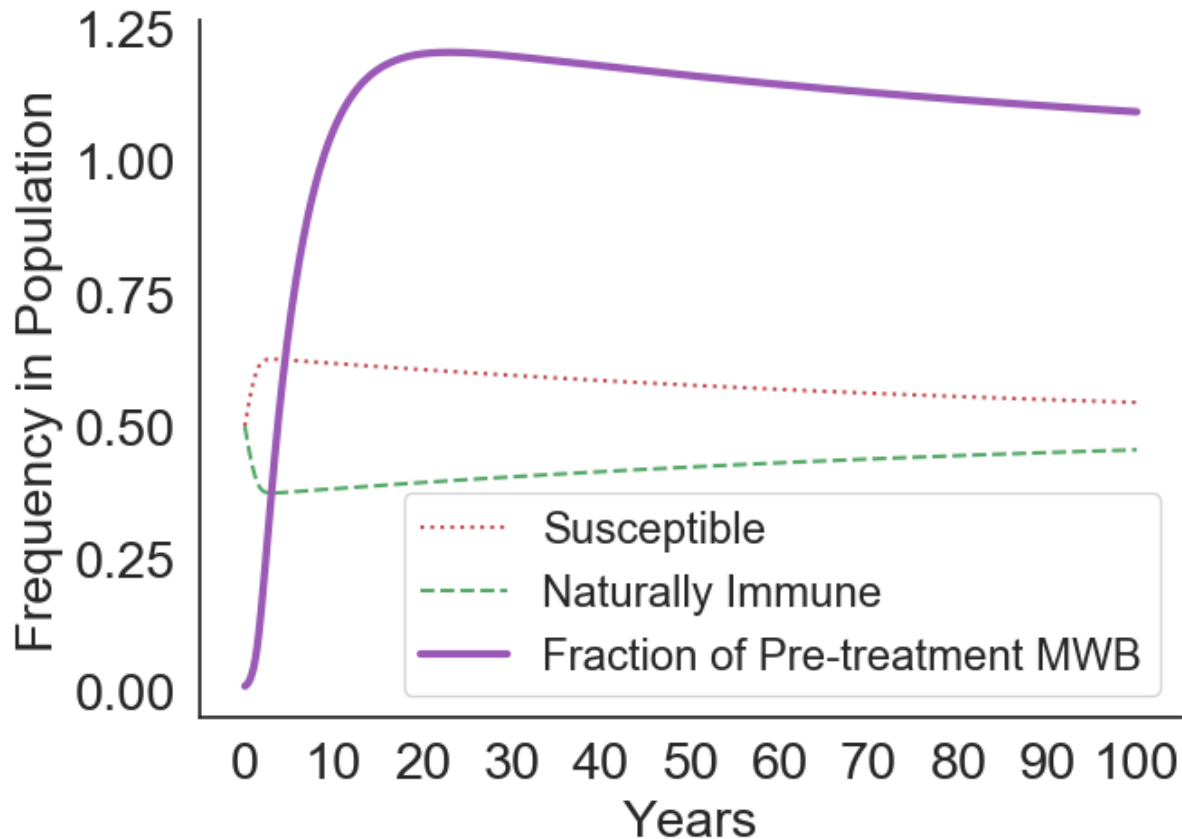

Figure 11: Simulation of the emergence of a schistosomiasis epidemic under default conditions. GDMI is not present, and long-term behavior of the model is observed to overshoot endemic equilibrium conditions and return to equilibrium over the course of many years. Susceptibility in snails is advantageous at low levels of infection early in the epidemic and is disadvantageous above equilibrium conditions.

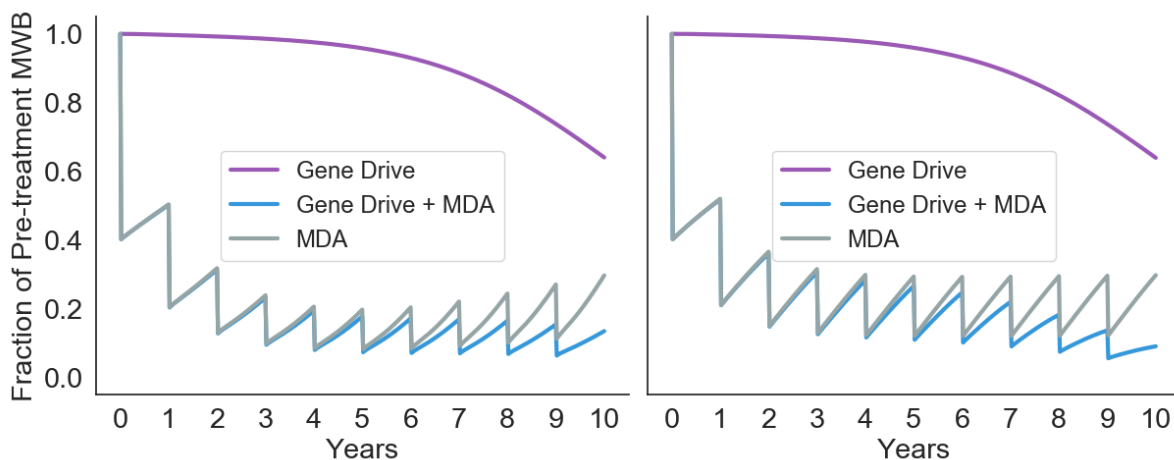

Figure 12: Comparative results among three treatment regimes under high and low transmission conditions.  $b$  is half of default conditions (left) and  $R_0 = 2.3$ , producing slower rebounds after annual MDA treatment. More rapid rebounds are observed when  $b$  is twice default conditions and  $R_0 = 4.5$  (right).

836 is higher, indicating that the efficacy of GDMI is enhanced in conditions that are challenging  
837 for reduction through MDA alone. Additionally, the intensity of MDA treatment may have a  
838 strong effect on the benefits of GDMI, as selection pressures are changed. Fig. S13 displays  
839 the difference in reduction of MWB between low and high intensity MDA use under equivalent  
840 GDMI application.

841 These results demonstrate diminishing returns for the application of MDA at higher con-  
842 centrations as immunity in snails evolves to favor higher transmission conditions when adult  
843 worms are eliminated quickly. Success of GDMI is slowed when force of infection on snails,  
844 and therefore positive selection on immunity, is reduced.

845 The treatment window of 10 years is common for evaluating funded public health cam-  
846 paigns, though results of this study will differ using longer treatment windows. We extend  
847 this window to 40 years to demonstrate the long-term effects of each of the treatment regimes.  
848 Additionally, we show that when MDA is remitted after 10 years, GDMI is able to maintain re-  
849 ductions in MWB, while without GDMI MWB returns to endemic equilibrium conditions (after



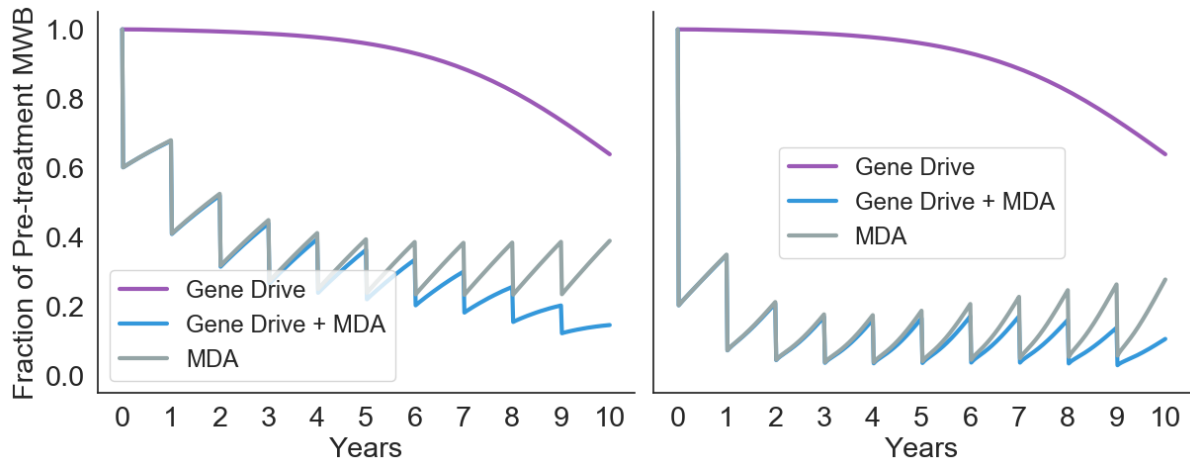

Figure 13: Comparative results among three treatment regimes under high and low intensity MDA application in the human population. 40% annual reduction in MWB (left) produces slower elimination across all treatment regimes compared to 80% annual reduction (right). Rebounds are concave down and relatively smaller for lower intensity MDA and concave up for high intensity MDA. This reflects slower loss of immunity, and for joint treatment the faster gain of GDMI, in the snail population due to higher selection pressure in favor of immunity in higher transmission conditions.

850 an overshoot also depicted in Fig. S11).

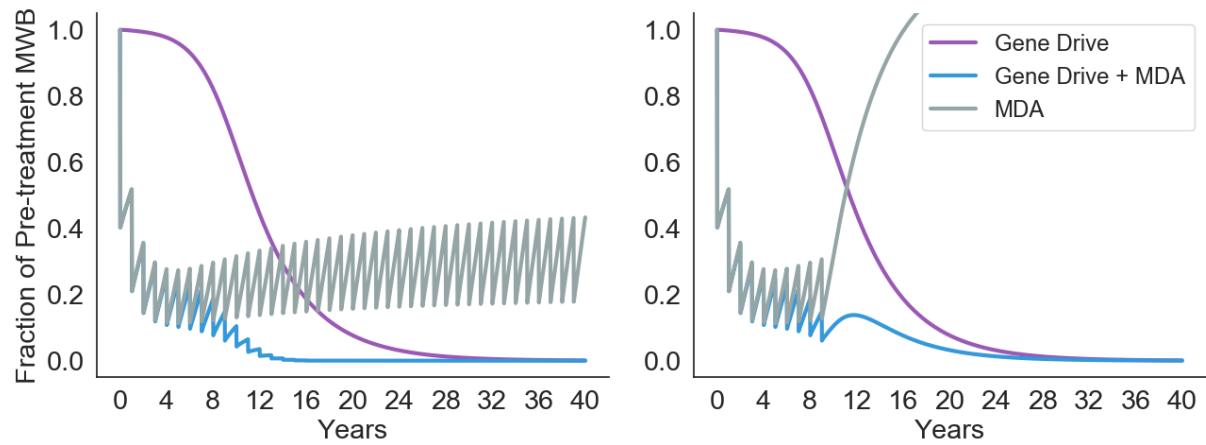

Figure 14: Simulations of the three treatment regimes for 40 years. MDA is continued annually for the duration of the simulation (left). MDA is stopped after 10 years of treatment (right).

## 851 References

- 852 1. Burt, A. Site-specific selfish genes as tools for the control and genetic engineering of  
853 natural populations. *Proceedings of the Royal Society of London. Series B: Biological*  
854 *Sciences* **270**, 921–928 (2003).
- 855 2. Cong, L. *et al.* Multiplex genome engineering using CRISPR/Cas systems. *Science* **339**,  
856 819–823 (2013).
- 857 3. Jinek, M. *et al.* A programmable dual-RNA–guided DNA endonuclease in adaptive bac-  
858 terial immunity. *science* **337**, 816–821 (2012).
- 859 4. Oye, K. A. *et al.* Regulating gene drives. *Science* **345**, 626–628 (2014).
- 860 5. Gantz, V. M. *et al.* Highly efficient Cas9-mediated gene drive for population modifica-  
861 tion of the malaria vector mosquito *Anopheles stephensi*. *Proceedings of the National*  
862 *Academy of Sciences* **112**, E6736–E6743 (2015).
- 863 6. Eckhoff, P. A., Wenger, E. A., Godfray, H. C. J. & Burt, A. Impact of mosquito gene  
864 drive on malaria elimination in a computational model with explicit spatial and temporal  
865 dynamics. *Proceedings of the National Academy of Sciences* **114**, E255–E264 (2017).
- 866 7. Windbichler, N. *et al.* A synthetic homing endonuclease-based gene drive system in the  
867 human malaria mosquito. *Nature* **473**, 212–215 (2011).
- 868 8. Marshall, J. M. & Taylor, C. E. Malaria control with transgenic mosquitoes. *PLoS Med* **6**,  
869 e1000020 (2009).
- 870 9. Connolly, J. B. *et al.* Systematic identification of plausible pathways to potential harm via  
871 problem formulation for investigational releases of a population suppression gene drive  
872 to control the human malaria vector *Anopheles gambiae* in West Africa. *Malaria Journal*  
873 **20**, 1–69 (2021).
- 874 10. Maier, T. *et al.* Gene drives for schistosomiasis transmission control. *PLoS neglected trop-*  
875 *ical diseases* **13**, e0007833 (2019).
- 876 11. Sturrock, R. Schistosomiasis epidemiology and control: how did we get here and where  
877 should we go? *Memórias do Instituto Oswaldo Cruz* **96**, 17–27 (2001).
- 878 12. Organization, W. H. *et al.* Schistosomiasis and soil-transmitted helminthiasis: number of  
879 people treated in 2015. *Weekly epidemiological record* **91**, 585–595 (2016).
- 880 13. King, C. H. & Galvani, A. P. Underestimation of the global burden of schistosomiasis.  
881 *The Lancet* **391**, 307–308 (2018).
- 882 14. Barron, L. & Wynn, T. A. Macrophage activation governs schistosomiasis-induced inflam-  
883 mation and fibrosis. *European journal of immunology* **41**, 2509–2514 (2011).
- 884 15. Mostafa, M. H., Sheweita, S. & O’Connor, P. J. Relationship between schistosomiasis and  
885 bladder cancer. *Clinical microbiology reviews* **12**, 97–111 (1999).

- 886 16. Andrade, Z. d. A. Schistosomiasis and liver fibrosis. *Parasite immunology* **31**, 656–663  
887 (2009).
- 888 17. Faro, M. J. *et al.* Biological, biochemical and histopathological features related to para-  
889 sitic castration of *Biomphalaria glabrata* infected by *Schistosoma mansoni*. *Experimental*  
890 *parasitology* **134**, 228–234 (2013).
- 891 18. Colley, D. G., Bustinduy, A. L., Secor, W. E. & King, C. H. Human schistosomiasis. *The*  
892 *Lancet* **383**, 2253–2264 (2014).
- 893 19. Tennessen, J. A. *et al.* Clusters of polymorphic transmembrane genes control resistance to  
894 schistosomes in snail vectors. *Elife* **9**, e59395 (2020).
- 895 20. Tennessen, J. A. *et al.* Hyperdiverse gene cluster in snail host conveys resistance to human  
896 schistosome parasites. *PLoS Genet* **11**, e1005067 (2015).
- 897 21. Webster, J. & Woolhouse, M. Selection and strain specificity of compatibility between  
898 snail intermediate hosts and their parasitic schistosomes. *Evolution* **52**, 1627–1634 (1998).
- 899 22. Unckless, R. L., Clark, A. G. & Messer, P. W. Evolution of resistance against CRISPR/Cas9  
900 gene drive. *Genetics* **205**, 827–841 (2017).
- 901 23. Noble, C. *et al.* Daisy-chain gene drives for the alteration of local populations. *Proceed-*  
902 *ings of the National Academy of Sciences* **116**, 8275–8282 (2019).
- 903 24. Noble, C., Olejarz, J., Esvelt, K. M., Church, G. M. & Nowak, M. A. Evolutionary dy-  
904 namics of CRISPR gene drives. *Science advances* **3**, e1601964 (2017).
- 905 25. Jarne, P., Vianey-Liaud, M. & Delay, B. Selfing and outcrossing in hermaphrodite fresh-  
906 water gastropods (Basommatophora): where, when and why. *Biological Journal of the*  
907 *Linnean Society* **49**, 99–125 (1993).
- 908 26. Organization, W. H. *et al.* Field use of molluscicides in schistosomiasis control pro-  
909 grammes: an operational manual for programme managers (2017).
- 910 27. Bergquist, R., Zhou, X.-N., Rollinson, D., Reinhard-Rupp, J. & Klohe, K. Elimination of  
911 schistosomiasis: the tools required. *Infectious Diseases of Poverty* **6**, 1–9 (2017).
- 912 28. Andrews, P., Thomas, H., Pohlke, R. & Seubert, J. Praziquantel. *Medicinal research re-*  
913 *views* **3**, 147–200 (1983).
- 914 29. King, C. H. & Mahmoud, A. A. Drugs five years later: praziquantel. *Annals of Internal*  
915 *Medicine* **110**, 290–296 (1989).
- 916 30. Kittur, N. *et al.* Persistent hotspots in schistosomiasis consortium for operational research  
917 and evaluation studies for gaining and sustaining control of schistosomiasis after four  
918 years of mass drug administration of praziquantel. *The American journal of tropical medicine*  
919 *and hygiene* **101**, 617–627 (2019).
- 920 31. Dejon-Agobé, J. C. *et al.* *Schistosoma haematobium* infection morbidity, praziquantel  
921 effectiveness and reinfection rate among children and young adults in Gabon. *Parasites &*  
922 *vectors* **12**, 1–11 (2019).

- 923 32. Sokolow, S. H. *et al.* To reduce the global burden of human schistosomiasis, use ‘old  
924 fashioned’ snail control. *Trends in parasitology* **34**, 23–40 (2018).
- 925 33. Lo, N. C. *et al.* Impact and cost-effectiveness of snail control to achieve disease control  
926 targets for schistosomiasis. *Proceedings of the National Academy of Sciences* **115**, E584–  
927 E591 (2018).
- 928 34. Hoover, C. M. *et al.* Modelled effects of prawn aquaculture on poverty alleviation and  
929 schistosomiasis control. *Nature Sustainability* **2**, 611–620 (2019).
- 930 35. Sokolow, S. H. *et al.* Reduced transmission of human schistosomiasis after restoration of  
931 a native river prawn that preys on the snail intermediate host. *Proceedings of the National  
932 Academy of Sciences* **112**, 9650–9655 (2015).
- 933 36. National Academies of Sciences, E., Medicine, *et al.* Gene drives on the horizon: advanc-  
934 ing science, navigating uncertainty, and aligning research with public values (2016).
- 935 37. Escobar, J. S. *et al.* Patterns of mating-system evolution in hermaphroditic animals: Cor-  
936 relations among selfing rate, inbreeding depression, and the timing of reproduction. *Evo-  
937 lution: International Journal of Organic Evolution* **65**, 1233–1253 (2011).
- 938 38. Jarne, P., Finot, L., Delay, B. & Thaler, L. Self-fertilization versus cross-fertilization in  
939 the hermaphroditic freshwater snail *Bulinus globosus*. *Evolution* **45**, 1136–1146 (1991).
- 940 39. Nguema, R. M. *et al.* Genetic diversity, fixation and differentiation of the freshwater snail  
941 *Biomphalaria pfeifferi* (Gastropoda, Planorbidae) in arid lands. *Genetica* **141**, 171–184  
942 (2013).
- 943 40. Gantz, V. M. & Bier, E. The mutagenic chain reaction: a method for converting heterozy-  
944 gous to homozygous mutations. *Science* **348**, 442–444 (2015).
- 945 41. Champer, S. E. *et al.* Computational and experimental performance of CRISPR homing  
946 gene drive strategies with multiplexed gRNAs. *Science Advances* **6**, eaaz0525 (2020).
- 947 42. Champer, J. *et al.* Reducing resistance allele formation in CRISPR gene drive. *Proceed-  
948 ings of the National Academy of Sciences* **115**, 5522–5527 (2018).
- 949 43. Webster, J. & Woolhouse, M. Cost of resistance: relationship between reduced fertility  
950 and increased resistance in a snail—schistosome host—parasite system. *Proceedings of  
951 the Royal Society of London. Series B: Biological Sciences* **266**, 391–396 (1999).
- 952 44. Crews, A. E. & Yoshino, T. P. *Schistosoma mansoni*: effect of infection on reproduction  
953 and gonadal growth in *Biomphalaria glabrata*. *Experimental Parasitology* **68**, 326–334  
954 (1989).
- 955 45. Woolhouse, M. The effect of schistosome infection on the mortality rates of *Bulinus glo-  
956 bosus* and *Biomphalaria pfeifferi*. *Annals of Tropical Medicine & Parasitology* **83**, 137–  
957 141 (1989).

- 958 46. Goddard, M. & Jordan, P. On the longevity of *Schistosoma mansoni* in man on St. Lucia,  
959 West Indies. *Transactions of the Royal Society of Tropical Medicine and Hygiene* **74**, 185–  
960 191 (1980).
- 961 47. Tycko, J., Myer, V. E. & Hsu, P. D. Methods for optimizing CRISPR-Cas9 genome editing  
962 specificity. *Molecular cell* **63**, 355–370 (2016).
- 963 48. Perez-Saez, J. *et al.* Hydrology and density feedbacks control the ecology of intermediate  
964 hosts of schistosomiasis across habitats in seasonal climates. *Proceedings of the National*  
965 *Academy of Sciences* **113**, 6427–6432 (2016).
- 966 49. Laidemitt, M. R. *et al.* Antagonism between parasites within snail hosts impacts the trans-  
967 mission of human schistosomiasis. *Elife* **8**, e50095 (2019).
- 968 50. Famakinde, D. O. Public health concerns over gene-drive mosquitoes: will future use of  
969 gene-drive snails for schistosomiasis control gain increased level of community accep-  
970 tance? *Pathogens and global health* **114**, 55–63 (2020).
- 971 51. Kofler, N. *et al.* Editing nature: Local roots of global governance. *Science* **362**, 527–529  
972 (2018).
- 973 52. Gurarie, D., Lo, N. C., Ndeffo-Mbah, M. L., Durham, D. P. & King, C. H. The human-  
974 snail transmission environment shapes long term schistosomiasis control outcomes: Im-  
975 plications for improving the accuracy of predictive modeling. *PLoS neglected tropical*  
976 *diseases* **12**, e0006514 (2018).
- 977 53. Webster, J. & Woolhouse, M. Cost of resistance: relationship between reduced fertility  
978 and increased resistance in a snail—schistosome host—parasite system. *Proceedings of*  
979 *the Royal Society of London. Series B: Biological Sciences* **266**, 391–396 (1999).
- 980 54. Doums, C., Viard, F., Pernot, A.-F., Delay, B. & Jarne, P. Inbreeding depression, neutral  
981 polymorphism, and copulatory behavior in freshwater snails: a self-fertilization syndrome.  
982 *Evolution* **50**, 1908–1918 (1996).
- 983 55. Woolhouse, M. The effect of schistosome infection on the mortality rates of *Bulinus glo-*  
984 *bosus* and *Biomphalaria pfeifferi*. *Annals of Tropical Medicine & Parasitology* **83**, 137–  
985 141 (1989).
- 986 56. Woolhouse, M. Population biology of the freshwater snail *Biomphalaria pfeifferi* in the  
987 Zimbabwe highveld. *Journal of Applied Ecology*, 687–694 (1992).
- 988 57. Tennessen, J. A. *et al.* Hyperdiverse gene cluster in snail host conveys resistance to human  
989 schistosome parasites. *PLoS genetics* **11**, e1005067 (2015).
- 990 58. Unckless, R. L., Clark, A. G. & Messer, P. W. Evolution of resistance against CRISPR/Cas9  
991 gene drive. *Genetics* **205**, 827–841 (2017).
- 992 59. Escobar, J. S. *et al.* Patterns of mating-system evolution in hermaphroditic animals: Cor-  
993 relations among selfing rate, inbreeding depression, and the timing of reproduction. *Evo-*  
994 *lution: International Journal of Organic Evolution* **65**, 1233–1253 (2011).

- 995 60. Gantz, V. M. & Bier, E. The mutagenic chain reaction: a method for converting heterozy-  
996 gous to homozygous mutations. *Science* **348**, 442–444 (2015).
- 997 61. Karlin, S. Equilibrium behavior of population genetic models with non-random mating.  
998 Part I: Preliminaries and special mating systems. *Journal of Applied Probability* **5**, 231–  
999 313 (1968).
- 1000 62. Tennessen, J. A. *et al.* Clusters of polymorphic transmembrane genes control resistance to  
1001 schistosomes in snail vectors. *Elife* **9**, e59395 (2020).
- 1002 63. Goddard, M. & Jordan, P. On the longevity of *Schistosoma mansoni* in man on St. Lucia,  
1003 West Indies. *Transactions of the Royal Society of Tropical Medicine and Hygiene* **74**, 185–  
1004 191 (1980).
- 1005 64. Mangal, T. D., Paterson, S. & Fenton, A. Predicting the impact of long-term temperature  
1006 changes on the epidemiology and control of schistosomiasis: a mechanistic model. *PLoS*  
1007 *one* **3**, e1438 (2008).
- 1008 65. Anderson, R. & May, R. Prevalence of schistosome infections within molluscan popula-  
1009 tions: observed patterns and theoretical predictions. *Parasitology* **79**, 63–94 (1979).
- 1010 66. Chan, M. *et al.* The development of an age structured model for schistosomiasis transmis-  
1011 sion dynamics and control and its validation for *Schistosoma mansoni*. *Epidemiology &*  
1012 *Infection* **115**, 325–344 (1995).
- 1013 67. Tchuenté, L.-A. T., Momo, S. C., Stothard, J. R. & Rollinson, D. Efficacy of praziquantel  
1014 and reinfection patterns in single and mixed infection foci for intestinal and urogenital  
1015 schistosomiasis in Cameroon. *Acta tropica* **128**, 275–283 (2013).
- 1016 68. May, R. M. Togetherness among schistosomes: its effects on the dynamics of the infection.  
1017 *Mathematical biosciences* **35**, 301–343 (1977).
- 1018 69. Woolhouse, M., Hasibeder, G. & Chandiwana, S. On estimating the basic reproduction  
1019 number for *Schistosoma haematobium*. *Tropical Medicine & International Health* **1**, 456–  
1020 463 (1996).
- 1021 70. Diekmann, O., Heesterbeek, J. & Roberts, M. G. The construction of next-generation  
1022 matrices for compartmental epidemic models. *Journal of the Royal Society Interface* **7**,  
1023 873–885 (2010).
